# Supplementary material for: Precursors to dinitrogen reduction: structures and reactivity of trans-[Fe(DMeOPrPE)2(η2-H2)H]+ and trans-[Fe(DMeOPrPE)2(N2)H]+
Source: Royal Society of Chemistry journal article supplement (doi:10.1039/b911066f), 2009-01-01
Supplement: b911066f.pdf [file b911066f.pdf]

## Electronic Supplementary Information

### Precursors to Dinitrogen Reduction: Synthesis and Reactivity of *trans*-[Fe(DMeOPrPE)<sub>2</sub>( $\eta^2$ -H<sub>2</sub>)H]<sup>+</sup> and *trans*-[Fe(DMeOPrPE)<sub>2</sub>(N<sub>2</sub>)H]<sup>+</sup>

Justin L. Crossland, Douglas M. Young, Lev N. Zakharov, David R. Tyler\*  
Department of Chemistry, University of Oregon, Eugene, Oregon 97403

#### Table of Contents

- Figure S1.** <sup>1</sup>H NMR spectrum of *trans*-[Fe(DMeOPrPE)<sub>2</sub>(H<sub>2</sub>)H][BPh<sub>4</sub>] **S-2**.  
**Figure S2.** <sup>31</sup>P{<sup>1</sup>H} NMR spectrum of *trans*-[Fe(DMeOPrPE)<sub>2</sub>(H<sub>2</sub>)H][BPh<sub>4</sub>] **S-2**.  
**Figure S3.** <sup>31</sup>P NMR spectrum of *trans*-[Fe(DMeOPrPE)<sub>2</sub>(H<sub>2</sub>)H][BPh<sub>4</sub>] **S-3**.  
**Figure S4.** <sup>1</sup>H NMR spectrum of [Fe(DMeOPrPE)<sub>2</sub>Cl][BPh<sub>4</sub>] **S-3**.  
**Figure S5.** <sup>31</sup>P{<sup>1</sup>H} NMR spectrum of [Fe(DMeOPrPE)<sub>2</sub>Cl][BPh<sub>4</sub>] **S-4**.  
**Figure S6.** <sup>31</sup>P{<sup>1</sup>H} NMR spectrum of *trans*-[Fe(DMeOPrPE)<sub>2</sub>H(N<sub>2</sub>)][BPh<sub>4</sub>] **S-4**.  
**Figure S7.** <sup>1</sup>H NMR spectrum of *trans*-[Fe(DMeOPrPE)<sub>2</sub>H(N<sub>2</sub>)][BPh<sub>4</sub>] **S-5**.  
**Figure S8.** IR spectrum (KBr pellet) of *trans*-[Fe(DMeOPrPE)<sub>2</sub>H(N<sub>2</sub>)][BPh<sub>4</sub>] **S-5**.  
**Table S1.** Atomic coordinates for *trans*-[Fe(DMeOPrPE)<sub>2</sub>(H<sub>2</sub>)H][BPh<sub>4</sub>] **S-6**.  
**Table S2.** Bond lengths and angles for *trans*-[Fe(DMeOPrPE)<sub>2</sub>(H<sub>2</sub>)H][BPh<sub>4</sub>] **S-9**.  
**Table S3.** Atomic coordinates for [Fe(DMeOPrPE)<sub>2</sub>Cl][BPh<sub>4</sub>] **S-25**.  
**Table S4.** Bond lengths and angles for [Fe(DMeOPrPE)<sub>2</sub>Cl][BPh<sub>4</sub>] **S-28**.  
**Table S5.** Atomic coordinates for *trans*-[Fe(DMeOPrPE)<sub>2</sub>H(N<sub>2</sub>)][BPh<sub>4</sub>] **S-34**.  
**Table S6.** Bond lengths and angles for *trans*-[Fe(DMeOPrPE)<sub>2</sub>H(N<sub>2</sub>)][BPh<sub>4</sub>] **S-37**.

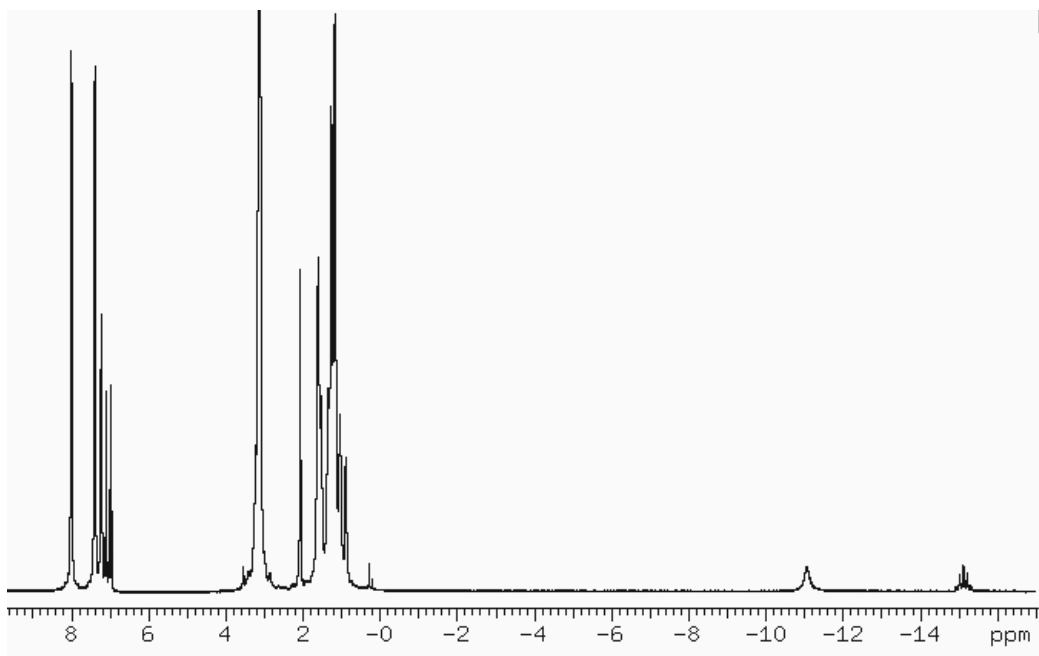

**Figure S1.**  $^1\text{H}$  NMR spectrum (toluene- $d_8$ ) at 233K of *trans*- $[\text{Fe}(\text{DMeOPrPE})_2(\text{H}_2)\text{H}][\text{BPh}_4]$ .

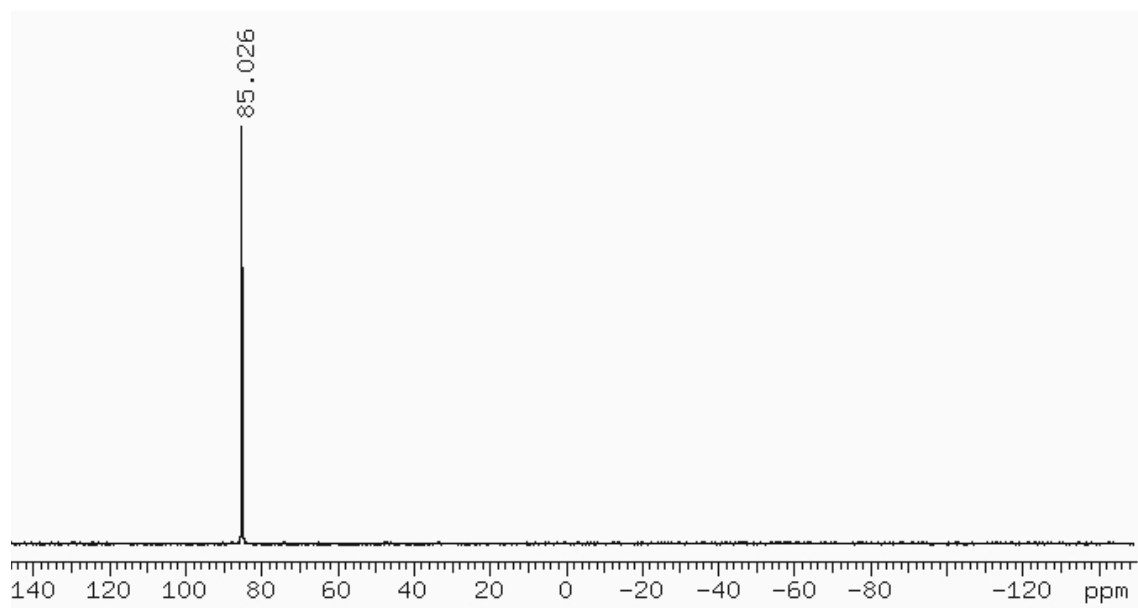

**Figure S2.**  $^{31}\text{P}\{^1\text{H}\}$  NMR spectrum (toluene- $d_8$ ) of *trans*- $[\text{Fe}(\text{DMeOPrPE})_2(\text{H}_2)\text{H}][\text{BPh}_4]$ .

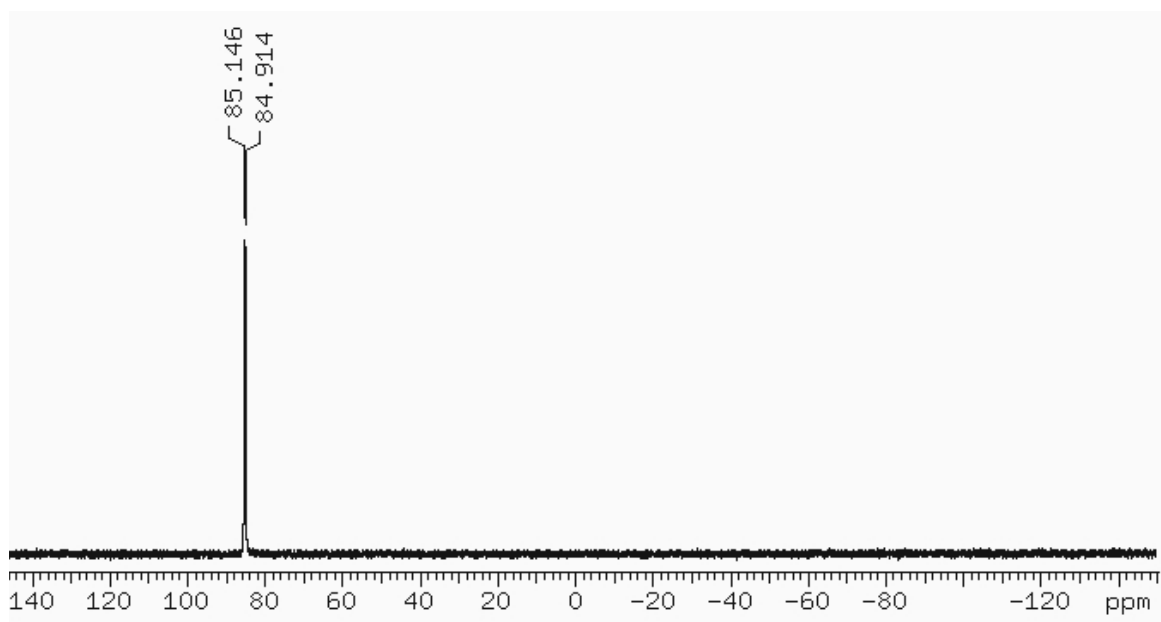

**Figure S3.**  $^{31}\text{P}$  NMR spectrum (toluene- $d_8$ ) at 233K of *trans*- $[\text{Fe}(\text{DMeOPrPE})_2(\text{H}_2)\text{H}][\text{BPh}_4]$ .

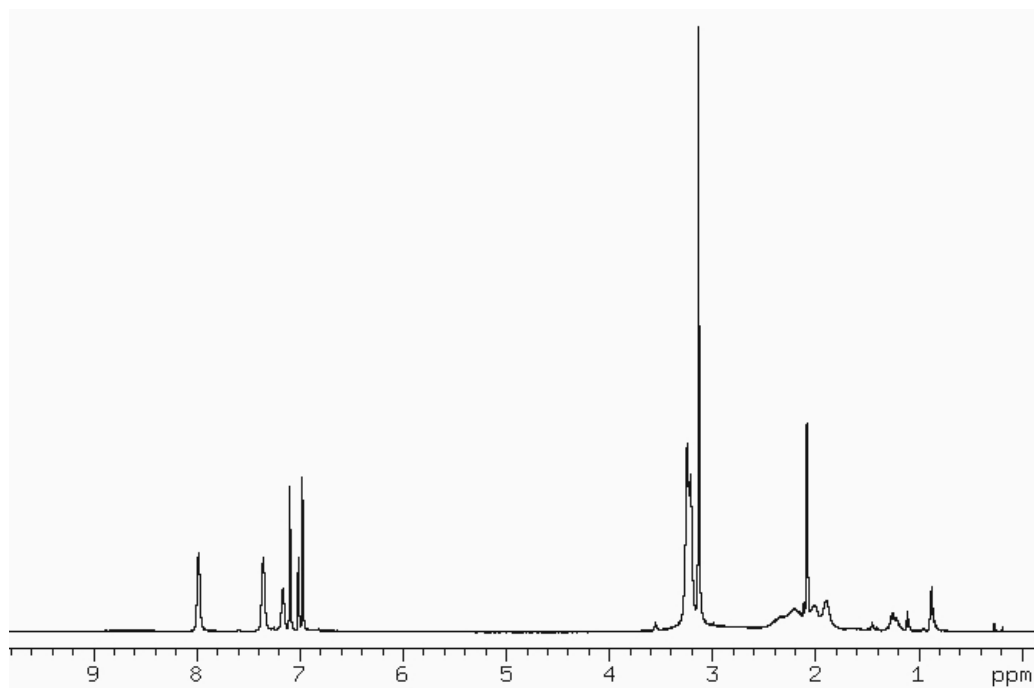

**Figure S4.**  $^1\text{H}$  NMR spectrum (toluene- $d_8$ ) of  $[\text{Fe}(\text{DMeOPrPE})_2\text{Cl}][\text{BPh}_4]$ .

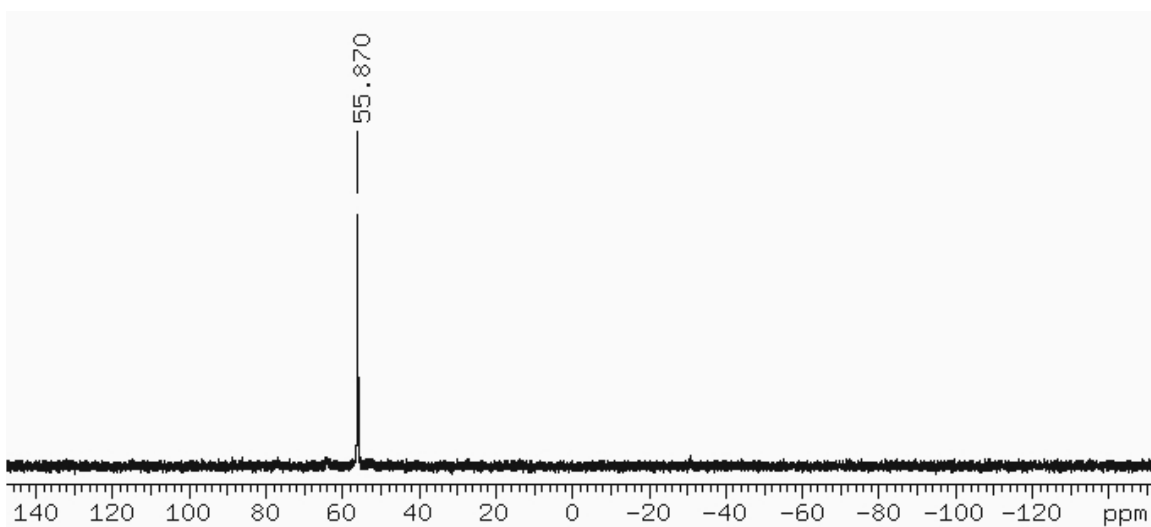

**Figure S5.**  $^{31}\text{P}\{^1\text{H}\}$  NMR spectrum (toluene- $d_8$ ) at 193K of  $[\text{Fe}(\text{DMeOPrPE})_2\text{Cl}][\text{BPh}_4]$ .

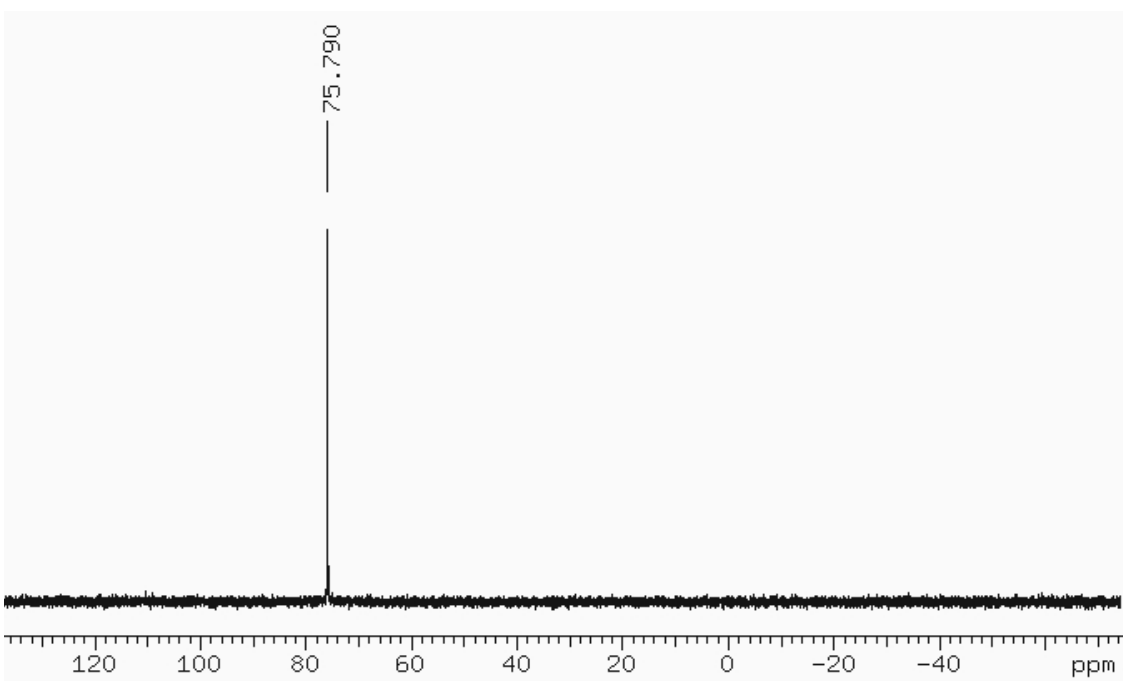

**Figure S6.**  $^{31}\text{P}\{^1\text{H}\}$  NMR spectrum of *trans*- $[\text{Fe}(\text{DMeOPrPE})_2\text{H}(\text{N}_2)][\text{BPh}_4]$ .

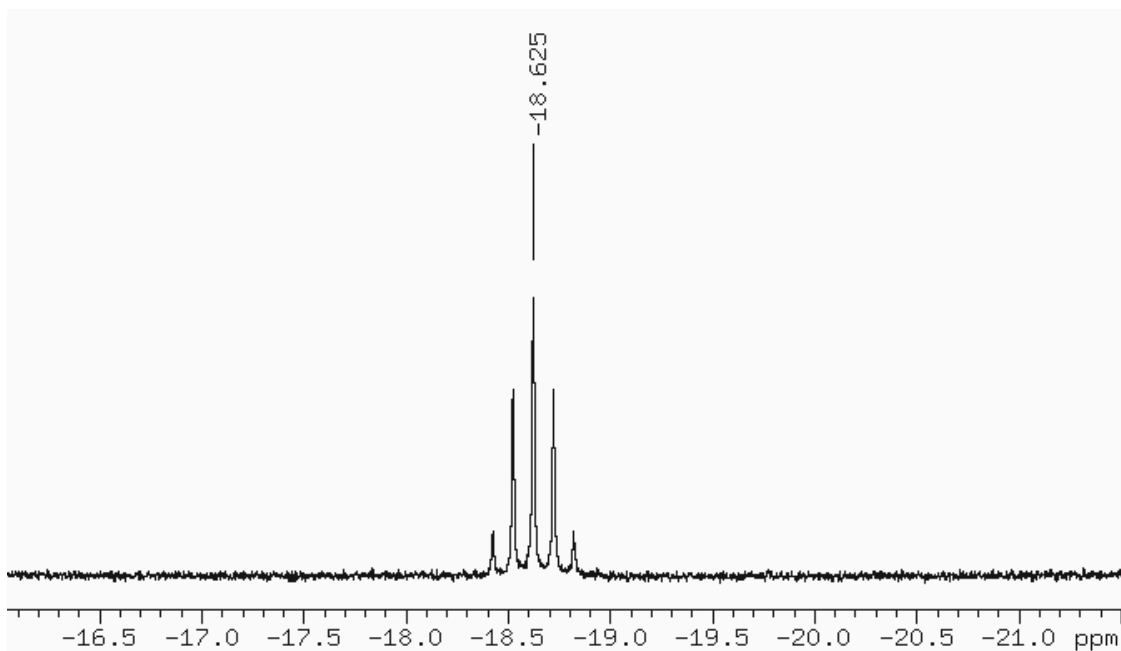

**Figure S7.** <sup>1</sup>H NMR spectrum of the hydride region of *trans*-[Fe(DMeOPrPE)<sub>2</sub>H(N<sub>2</sub>)] [BPh<sub>4</sub>].

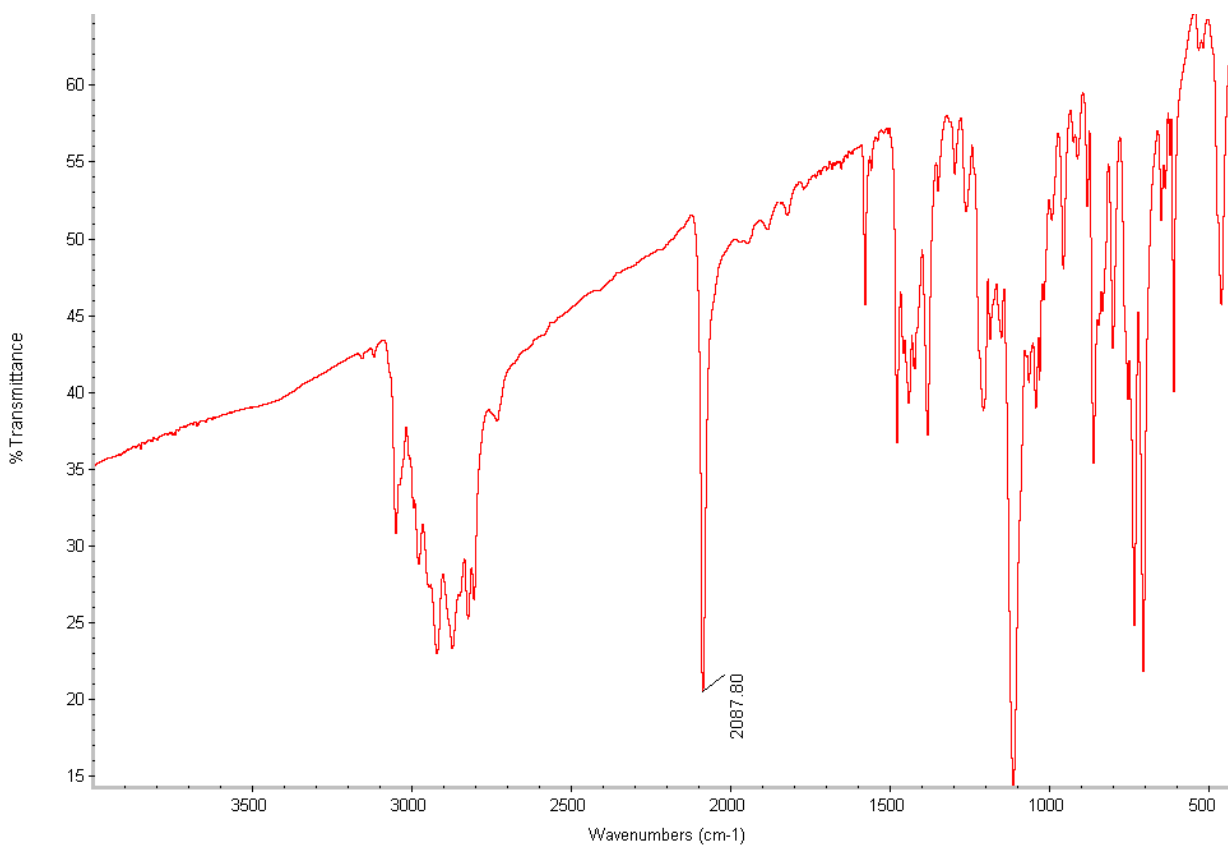

**Figure S8.** IR spectrum (KBr pellet) of *trans*-[Fe(DMeOPrPE)<sub>2</sub>H(N<sub>2</sub>)] [BPh<sub>4</sub>].

**Table S1.** Atomic coordinates ( $\times 10^4$ ) and equivalent isotropic displacement parameters ( $\text{\AA}^2 \times 10^3$ ) for *trans*-[Fe(DMeOPrPE)<sub>2</sub>H(H<sub>2</sub>)] [BPh<sub>4</sub>]. U(eq) is defined as one third of the trace of the orthogonalized U<sup>ij</sup> tensor.

|        | x        | y       | z       | U(eq) |
|--------|----------|---------|---------|-------|
| Fe(1)  | 2596(2)  | 3014(1) | 2786(1) | 15(1) |
| Fe(1A) | 2909(8)  | 3109(3) | 2731(2) | 15(1) |
| P(1)   | 2057(1)  | 4209(1) | 2680(1) | 14(1) |
| P(2)   | 3667(1)  | 3465(1) | 3993(1) | 15(1) |
| P(3)   | 3328(1)  | 1888(1) | 2867(1) | 15(1) |
| P(4)   | 1775(1)  | 2641(1) | 1548(1) | 15(1) |
| O(1)   | -1851(1) | 4761(1) | 2619(1) | 26(1) |
| O(2)   | 5168(1)  | 6462(1) | 2238(1) | 31(1) |
| O(3)   | 1232(1)  | 2592(1) | 5711(1) | 34(1) |
| O(4)   | 8273(1)  | 4202(1) | 5164(1) | 24(1) |
| O(5)   | 2646(1)  | 843(1)  | 5104(1) | 31(1) |
| O(6)   | 7550(1)  | 1695(1) | 3743(1) | 31(1) |
| O(7)   | -2692(1) | 2228(1) | 1210(1) | 24(1) |
| O(8)   | 5513(1)  | 4182(1) | 429(1)  | 27(1) |
| C(1)   | 2320(1)  | 4640(1) | 3654(1) | 17(1) |
| C(2)   | 3663(1)  | 4546(1) | 4125(1) | 17(1) |
| C(3)   | 2384(1)  | 1191(1) | 2014(1) | 19(1) |
| C(4)   | 2245(1)  | 1705(1) | 1325(1) | 20(1) |
| C(5)   | 370(1)   | 4300(1) | 2213(1) | 17(1) |
| C(6)   | -718(1)  | 3746(1) | 2500(1) | 19(1) |
| C(7)   | -2022(1) | 3991(1) | 2243(1) | 23(1) |
| C(8)   | -3014(2) | 5058(1) | 2389(1) | 34(1) |
| C(9)   | 3060(1)  | 5038(1) | 2270(1) | 18(1) |
| C(10)  | 3093(2)  | 5913(1) | 2504(1) | 24(1) |
| C(11)  | 3857(1)  | 6550(1) | 2101(1) | 26(1) |
| C(12)  | 5964(2)  | 7128(1) | 1966(1) | 39(1) |
| C(13)  | 2859(1)  | 2974(1) | 4699(1) | 19(1) |
| C(14)  | 3184(2)  | 3418(1) | 5484(1) | 31(1) |
| C(15)  | 2618(2)  | 2858(1) | 6027(1) | 33(1) |
| C(16)  | 652(2)   | 2045(1) | 6187(1) | 45(1) |

|       |          |         |         |       |
|-------|----------|---------|---------|-------|
| C(17) | 5408(1)  | 3470(1) | 4449(1) | 17(1) |
| C(18) | 6408(1)  | 3938(1) | 4054(1) | 21(1) |
| C(19) | 7796(1)  | 3836(1) | 4405(1) | 24(1) |
| C(20) | 9553(2)  | 4092(1) | 5540(1) | 32(1) |
| C(21) | 3198(1)  | 1229(1) | 3657(1) | 18(1) |
| C(22) | 1815(1)  | 977(1)  | 3773(1) | 22(1) |
| C(23) | 1764(2)  | 417(1)  | 4419(1) | 28(1) |
| C(24) | 2644(2)  | 364(1)  | 5742(1) | 45(1) |
| C(25) | 5058(1)  | 1996(1) | 2867(1) | 19(1) |
| C(26) | 5508(1)  | 1217(1) | 2788(1) | 25(1) |
| C(27) | 7001(2)  | 1393(1) | 2969(1) | 26(1) |
| C(28) | 8955(2)  | 1872(1) | 3962(1) | 43(1) |
| C(29) | -26(1)   | 2354(1) | 1116(1) | 18(1) |
| C(30) | -823(1)  | 1647(1) | 1450(1) | 21(1) |
| C(31) | -2295(1) | 1512(1) | 1061(1) | 23(1) |
| C(32) | -4009(2) | 2187(1) | 782(1)  | 33(1) |
| C(33) | 2257(1)  | 3296(1) | 817(1)  | 19(1) |
| C(34) | 3753(1)  | 3644(1) | 968(1)  | 22(1) |
| C(35) | 4151(1)  | 3760(1) | 233(1)  | 25(1) |
| C(36) | 6038(2)  | 4204(1) | -208(1) | 33(1) |
| B(1)  | 8836(1)  | 1680(1) | 8229(1) | 16(1) |
| C(37) | 7890(1)  | 1701(1) | 7351(1) | 17(1) |
| C(38) | 6971(1)  | 991(1)  | 6953(1) | 22(1) |
| C(39) | 6211(2)  | 975(1)  | 6200(1) | 28(1) |
| C(40) | 6326(2)  | 1681(1) | 5808(1) | 30(1) |
| C(41) | 7213(2)  | 2394(1) | 6178(1) | 27(1) |
| C(42) | 7975(1)  | 2397(1) | 6930(1) | 20(1) |
| C(43) | 9338(1)  | 2607(1) | 8655(1) | 16(1) |
| C(44) | 10352(1) | 3206(1) | 8483(1) | 20(1) |
| C(45) | 10754(1) | 4005(1) | 8803(1) | 21(1) |
| C(46) | 10159(1) | 4240(1) | 9325(1) | 21(1) |
| C(47) | 9175(1)  | 3665(1) | 9519(1) | 20(1) |
| C(48) | 8775(1)  | 2866(1) | 9188(1) | 17(1) |
| C(49) | 8003(1)  | 1056(1) | 8723(1) | 17(1) |
| C(50) | 6640(1)  | 959(1)  | 8623(1) | 22(1) |
| C(51) | 5937(1)  | 438(1)  | 9043(1) | 24(1) |

|       |          |         |         |       |
|-------|----------|---------|---------|-------|
| C(52) | 6577(1)  | -12(1)  | 9592(1) | 22(1) |
| C(53) | 7926(1)  | 81(1)   | 9722(1) | 21(1) |
| C(54) | 8614(1)  | 601(1)  | 9294(1) | 19(1) |
| C(55) | 10131(1) | 1349(1) | 8187(1) | 17(1) |
| C(56) | 11344(1) | 1558(1) | 8765(1) | 20(1) |
| C(57) | 12428(1) | 1255(1) | 8746(1) | 24(1) |
| C(58) | 12337(1) | 726(1)  | 8146(1) | 25(1) |
| C(59) | 11158(1) | 499(1)  | 7568(1) | 25(1) |
| C(60) | 10086(1) | 809(1)  | 7592(1) | 21(1) |

---



**Table S2.** Bond lengths [Å] and angles [°] for *trans*-[Fe(DMeOPrPE)<sub>2</sub>H(H<sub>2</sub>)][BPh<sub>4</sub>].

---

|             |            |
|-------------|------------|
| Fe(1)-P(4)  | 2.2158(6)  |
| Fe(1)-P(3)  | 2.2203(5)  |
| Fe(1)-P(2)  | 2.2239(5)  |
| Fe(1)-P(1)  | 2.2278(5)  |
| Fe(1)-H(1)  | 1.559(19)  |
| Fe(1)-H(2)  | 1.52(3)    |
| Fe(1)-H(3)  | 1.51(3)    |
| Fe(1A)-P(4) | 2.207(4)   |
| Fe(1A)-P(3) | 2.217(4)   |
| Fe(1A)-P(2) | 2.248(4)   |
| Fe(1A)-P(1) | 2.256(4)   |
| Fe(1A)-H(1) | 1.183(19)  |
| Fe(1A)-H(2) | 1.89(3)    |
| Fe(1A)-H(3) | 1.89(3)    |
| P(1)-C(5)   | 1.8365(13) |
| P(1)-C(1)   | 1.8422(13) |
| P(1)-C(9)   | 1.8482(13) |
| P(2)-C(13)  | 1.8395(14) |
| P(2)-C(17)  | 1.8395(13) |
| P(2)-C(2)   | 1.8447(13) |
| P(3)-C(21)  | 1.8351(13) |
| P(3)-C(25)  | 1.8390(14) |
| P(3)-C(3)   | 1.8446(13) |
| P(4)-C(29)  | 1.8358(13) |
| P(4)-C(33)  | 1.8387(14) |
| P(4)-C(4)   | 1.8511(13) |
| O(1)-C(7)   | 1.4191(17) |
| O(1)-C(8)   | 1.4238(18) |
| O(2)-C(11)  | 1.4181(17) |
| O(2)-C(12)  | 1.4230(18) |
| O(3)-C(15)  | 1.411(2)   |
| O(3)-C(16)  | 1.423(2)   |
| O(4)-C(19)  | 1.4216(17) |
| O(4)-C(20)  | 1.4251(17) |

|              |            |
|--------------|------------|
| O(5)-C(24)   | 1.416(2)   |
| O(5)-C(23)   | 1.4170(19) |
| O(6)-C(27)   | 1.4136(19) |
| O(6)-C(28)   | 1.4191(19) |
| O(7)-C(32)   | 1.4124(17) |
| O(7)-C(31)   | 1.4276(16) |
| O(8)-C(35)   | 1.4217(17) |
| O(8)-C(36)   | 1.4226(18) |
| C(1)-C(2)    | 1.5186(18) |
| C(1)-H(1A)   | 0.951(16)  |
| C(1)-H(1B)   | 0.971(17)  |
| C(2)-H(2A)   | 0.961(16)  |
| C(2)-H(2B)   | 0.961(17)  |
| C(3)-C(4)    | 1.5206(19) |
| C(3)-H(3A)   | 0.922(19)  |
| C(3)-H(3B)   | 0.959(17)  |
| C(4)-H(4A)   | 0.997(18)  |
| C(4)-H(4B)   | 0.956(18)  |
| C(5)-C(6)    | 1.5322(18) |
| C(5)-H(5A)   | 0.991(17)  |
| C(5)-H(5B)   | 0.965(17)  |
| C(6)-C(7)    | 1.5188(18) |
| C(6)-H(6A)   | 0.965(16)  |
| C(6)-H(6B)   | 0.948(17)  |
| C(7)-H(7A)   | 0.989(17)  |
| C(7)-H(7B)   | 1.010(17)  |
| C(8)-H(8A)   | 0.97(2)    |
| C(8)-H(8B)   | 0.95(2)    |
| C(8)-H(8C)   | 1.02(2)    |
| C(9)-C(10)   | 1.5298(18) |
| C(9)-H(9A)   | 0.961(16)  |
| C(9)-H(9B)   | 0.982(17)  |
| C(10)-C(11)  | 1.5136(19) |
| C(10)-H(10A) | 0.933(19)  |
| C(10)-H(10B) | 0.983(19)  |
| C(11)-H(11A) | 1.003(18)  |

|              |            |
|--------------|------------|
| C(11)-H(11B) | 0.989(19)  |
| C(12)-H(12A) | 0.95(2)    |
| C(12)-H(12B) | 0.99(2)    |
| C(12)-H(12C) | 1.01(2)    |
| C(13)-C(14)  | 1.5266(19) |
| C(13)-H(13A) | 0.992(17)  |
| C(13)-H(13B) | 0.935(17)  |
| C(14)-C(15)  | 1.518(2)   |
| C(14)-H(14A) | 1.03(2)    |
| C(14)-H(14B) | 0.97(2)    |
| C(15)-H(15A) | 1.01(2)    |
| C(15)-H(15B) | 0.977(18)  |
| C(16)-H(16A) | 0.99(2)    |
| C(16)-H(16B) | 1.03(2)    |
| C(16)-H(16C) | 1.02(2)    |
| C(17)-C(18)  | 1.5275(18) |
| C(17)-H(17A) | 0.955(17)  |
| C(17)-H(17B) | 0.942(17)  |
| C(18)-C(19)  | 1.5162(19) |
| C(18)-H(18A) | 0.937(17)  |
| C(18)-H(18B) | 1.004(17)  |
| C(19)-H(19A) | 0.982(18)  |
| C(19)-H(19B) | 0.998(17)  |
| C(20)-H(20A) | 0.971(19)  |
| C(20)-H(20B) | 0.966(19)  |
| C(20)-H(20C) | 0.98(2)    |
| C(21)-C(22)  | 1.5294(19) |
| C(21)-H(21A) | 0.969(16)  |
| C(21)-H(21B) | 0.975(17)  |
| C(22)-C(23)  | 1.516(2)   |
| C(22)-H(22A) | 0.987(17)  |
| C(22)-H(22B) | 0.951(17)  |
| C(23)-H(23A) | 1.016(18)  |
| C(23)-H(23B) | 0.996(19)  |
| C(24)-H(24A) | 0.98(2)    |
| C(24)-H(24B) | 1.02(2)    |

|              |            |
|--------------|------------|
| C(24)-H(24C) | 1.01(2)    |
| C(25)-C(26)  | 1.5291(19) |
| C(25)-H(25A) | 1.008(18)  |
| C(25)-H(25B) | 0.949(17)  |
| C(26)-C(27)  | 1.514(2)   |
| C(26)-H(26A) | 0.981(19)  |
| C(26)-H(26B) | 0.948(19)  |
| C(27)-H(27A) | 0.977(19)  |
| C(27)-H(27B) | 0.957(18)  |
| C(28)-H(28A) | 0.98(2)    |
| C(28)-H(28B) | 1.04(3)    |
| C(28)-H(28C) | 1.00(2)    |
| C(29)-C(30)  | 1.5282(19) |
| C(29)-H(29A) | 0.955(16)  |
| C(29)-H(29B) | 0.961(17)  |
| C(30)-C(31)  | 1.5175(18) |
| C(30)-H(30A) | 0.979(16)  |
| C(30)-H(30B) | 0.963(18)  |
| C(31)-H(31A) | 0.986(16)  |
| C(31)-H(31B) | 0.990(17)  |
| C(32)-H(32A) | 0.99(2)    |
| C(32)-H(32B) | 1.008(19)  |
| C(32)-H(32C) | 0.961(19)  |
| C(33)-C(34)  | 1.5330(19) |
| C(33)-H(33A) | 0.974(17)  |
| C(33)-H(33B) | 0.980(17)  |
| C(34)-C(35)  | 1.515(2)   |
| C(34)-H(34A) | 0.985(17)  |
| C(34)-H(34B) | 1.011(18)  |
| C(35)-H(35A) | 0.990(18)  |
| C(35)-H(35B) | 0.990(18)  |
| C(36)-H(36A) | 1.01(2)    |
| C(36)-H(36B) | 0.996(18)  |
| C(36)-H(36C) | 1.01(2)    |
| B(1)-C(43)   | 1.6475(18) |
| B(1)-C(55)   | 1.6504(19) |

|             |            |
|-------------|------------|
| B(1)-C(49)  | 1.6512(19) |
| B(1)-C(37)  | 1.6527(19) |
| C(37)-C(42) | 1.4027(18) |
| C(37)-C(38) | 1.4107(19) |
| C(38)-C(39) | 1.391(2)   |
| C(38)-H(38) | 0.930(17)  |
| C(39)-C(40) | 1.388(2)   |
| C(39)-H(39) | 0.961(19)  |
| C(40)-C(41) | 1.386(2)   |
| C(40)-H(40) | 0.95(2)    |
| C(41)-C(42) | 1.3926(19) |
| C(41)-H(41) | 0.927(18)  |
| C(42)-H(42) | 0.945(17)  |
| C(43)-C(48) | 1.3998(18) |
| C(43)-C(44) | 1.4096(18) |
| C(44)-C(45) | 1.3907(19) |
| C(44)-H(44) | 0.965(17)  |
| C(45)-C(46) | 1.392(2)   |
| C(45)-H(45) | 0.946(17)  |
| C(46)-C(47) | 1.385(2)   |
| C(46)-H(46) | 0.962(17)  |
| C(47)-C(48) | 1.3964(18) |
| C(47)-H(47) | 0.960(16)  |
| C(48)-H(48) | 0.939(15)  |
| C(49)-C(50) | 1.4070(19) |
| C(49)-C(54) | 1.4079(18) |
| C(50)-C(51) | 1.393(2)   |
| C(50)-H(50) | 0.950(17)  |
| C(51)-C(52) | 1.391(2)   |
| C(51)-H(51) | 0.937(18)  |
| C(52)-C(53) | 1.385(2)   |
| C(52)-H(52) | 0.917(17)  |
| C(53)-C(54) | 1.3933(19) |
| C(53)-H(53) | 0.974(17)  |
| C(54)-H(54) | 0.944(16)  |
| C(55)-C(60) | 1.4008(19) |

|                  |            |
|------------------|------------|
| C(55)-C(56)      | 1.4069(18) |
| C(56)-C(57)      | 1.3973(19) |
| C(56)-H(56)      | 0.918(17)  |
| C(57)-C(58)      | 1.380(2)   |
| C(57)-H(57)      | 0.944(17)  |
| C(58)-C(59)      | 1.385(2)   |
| C(58)-H(58)      | 0.957(18)  |
| C(59)-C(60)      | 1.3942(19) |
| C(59)-H(59)      | 0.980(17)  |
| C(60)-H(60)      | 0.961(17)  |
|                  |            |
| P(4)-Fe(1)-P(3)  | 85.37(2)   |
| P(4)-Fe(1)-P(2)  | 172.49(11) |
| P(3)-Fe(1)-P(2)  | 93.986(19) |
| P(4)-Fe(1)-P(1)  | 94.43(2)   |
| P(3)-Fe(1)-P(1)  | 174.09(11) |
| P(2)-Fe(1)-P(1)  | 85.440(17) |
| P(4)-Fe(1)-H(1)  | 86.7(7)    |
| P(3)-Fe(1)-H(1)  | 88.8(7)    |
| P(2)-Fe(1)-H(1)  | 85.8(7)    |
| P(1)-Fe(1)-H(1)  | 85.3(7)    |
| P(4)-Fe(1)-H(2)  | 91.3(11)   |
| P(3)-Fe(1)-H(2)  | 79.9(12)   |
| P(2)-Fe(1)-H(2)  | 96.0(11)   |
| P(1)-Fe(1)-H(2)  | 106.0(12)  |
| H(1)-Fe(1)-H(2)  | 168.7(13)  |
| P(4)-Fe(1)-H(3)  | 96.5(10)   |
| P(3)-Fe(1)-H(3)  | 106.2(11)  |
| P(2)-Fe(1)-H(3)  | 90.8(10)   |
| P(1)-Fe(1)-H(3)  | 79.7(11)   |
| H(1)-Fe(1)-H(3)  | 164.8(13)  |
| H(2)-Fe(1)-H(3)  | 26.5(13)   |
| P(4)-Fe(1A)-P(3) | 85.66(12)  |
| P(4)-Fe(1A)-P(2) | 168.0(5)   |
| P(3)-Fe(1A)-P(2) | 93.41(14)  |
| P(4)-Fe(1A)-P(1) | 93.90(14)  |

|                   |            |
|-------------------|------------|
| P(3)-Fe(1A)-P(1)  | 166.5(5)   |
| P(2)-Fe(1A)-P(1)  | 84.22(13)  |
| P(4)-Fe(1A)-H(1)  | 97.5(10)   |
| P(3)-Fe(1A)-H(1)  | 99.9(10)   |
| P(2)-Fe(1A)-H(1)  | 94.5(10)   |
| P(1)-Fe(1A)-H(1)  | 93.5(10)   |
| P(4)-Fe(1A)-H(2)  | 82.7(9)    |
| P(3)-Fe(1A)-H(2)  | 73.2(10)   |
| P(2)-Fe(1A)-H(2)  | 85.6(9)    |
| P(1)-Fe(1A)-H(2)  | 93.3(10)   |
| H(1)-Fe(1A)-H(2)  | 173.1(13)  |
| P(4)-Fe(1A)-H(3)  | 86.8(8)    |
| P(3)-Fe(1A)-H(3)  | 94.2(9)    |
| P(2)-Fe(1A)-H(3)  | 81.4(8)    |
| P(1)-Fe(1A)-H(3)  | 72.2(9)    |
| H(1)-Fe(1A)-H(3)  | 165.5(13)  |
| H(2)-Fe(1A)-H(3)  | 21.2(11)   |
| C(5)-P(1)-C(1)    | 101.15(6)  |
| C(5)-P(1)-C(9)    | 101.63(6)  |
| C(1)-P(1)-C(9)    | 102.81(6)  |
| C(5)-P(1)-Fe(1)   | 122.81(6)  |
| C(1)-P(1)-Fe(1)   | 107.35(5)  |
| C(9)-P(1)-Fe(1)   | 118.23(7)  |
| C(5)-P(1)-Fe(1A)  | 129.57(17) |
| C(1)-P(1)-Fe(1A)  | 109.88(11) |
| C(9)-P(1)-Fe(1A)  | 108.7(2)   |
| Fe(1)-P(1)-Fe(1A) | 9.64(18)   |
| C(13)-P(2)-C(17)  | 101.53(6)  |
| C(13)-P(2)-C(2)   | 102.98(6)  |
| C(17)-P(2)-C(2)   | 102.63(6)  |
| C(13)-P(2)-Fe(1)  | 114.47(7)  |
| C(17)-P(2)-Fe(1)  | 123.81(6)  |
| C(2)-P(2)-Fe(1)   | 109.02(4)  |
| C(13)-P(2)-Fe(1A) | 123.7(2)   |
| C(17)-P(2)-Fe(1A) | 116.1(2)   |
| C(2)-P(2)-Fe(1A)  | 107.37(11) |

|                   |            |
|-------------------|------------|
| Fe(1)-P(2)-Fe(1A) | 9.68(18)   |
| C(21)-P(3)-C(25)  | 102.02(6)  |
| C(21)-P(3)-C(3)   | 102.87(6)  |
| C(25)-P(3)-C(3)   | 102.97(6)  |
| C(21)-P(3)-Fe(1)  | 120.39(6)  |
| C(25)-P(3)-Fe(1)  | 117.40(7)  |
| C(3)-P(3)-Fe(1)   | 109.00(5)  |
| C(21)-P(3)-Fe(1A) | 127.43(18) |
| C(25)-P(3)-Fe(1A) | 107.9(2)   |
| C(3)-P(3)-Fe(1A)  | 110.97(11) |
| Fe(1)-P(3)-Fe(1A) | 9.77(19)   |
| C(29)-P(4)-C(33)  | 98.96(6)   |
| C(29)-P(4)-C(4)   | 101.75(6)  |
| C(33)-P(4)-C(4)   | 100.77(6)  |
| C(29)-P(4)-Fe(1A) | 129.0(2)   |
| C(33)-P(4)-Fe(1A) | 113.9(2)   |
| C(4)-P(4)-Fe(1A)  | 108.54(11) |
| C(29)-P(4)-Fe(1)  | 119.87(7)  |
| C(33)-P(4)-Fe(1)  | 122.01(6)  |
| C(4)-P(4)-Fe(1)   | 110.20(5)  |
| Fe(1A)-P(4)-Fe(1) | 9.80(19)   |
| C(7)-O(1)-C(8)    | 112.09(12) |
| C(11)-O(2)-C(12)  | 110.78(12) |
| C(15)-O(3)-C(16)  | 110.91(14) |
| C(19)-O(4)-C(20)  | 111.58(11) |
| C(24)-O(5)-C(23)  | 111.95(14) |
| C(27)-O(6)-C(28)  | 111.68(13) |
| C(32)-O(7)-C(31)  | 111.51(11) |
| C(35)-O(8)-C(36)  | 111.90(12) |
| C(2)-C(1)-P(1)    | 106.72(9)  |
| C(2)-C(1)-H(1A)   | 111.7(9)   |
| P(1)-C(1)-H(1A)   | 112.1(9)   |
| C(2)-C(1)-H(1B)   | 110.2(10)  |
| P(1)-C(1)-H(1B)   | 106.5(9)   |
| H(1A)-C(1)-H(1B)  | 109.5(13)  |
| C(1)-C(2)-P(2)    | 107.06(8)  |



|                  |            |
|------------------|------------|
| C(1)-C(2)-H(2A)  | 109.4(9)   |
| P(2)-C(2)-H(2A)  | 107.6(9)   |
| C(1)-C(2)-H(2B)  | 112.9(10)  |
| P(2)-C(2)-H(2B)  | 110.7(10)  |
| H(2A)-C(2)-H(2B) | 109.1(13)  |
| C(4)-C(3)-P(3)   | 107.44(9)  |
| C(4)-C(3)-H(3A)  | 113.0(11)  |
| P(3)-C(3)-H(3A)  | 110.2(11)  |
| C(4)-C(3)-H(3B)  | 111.8(10)  |
| P(3)-C(3)-H(3B)  | 107.1(10)  |
| H(3A)-C(3)-H(3B) | 107.1(14)  |
| C(3)-C(4)-P(4)   | 109.58(9)  |
| C(3)-C(4)-H(4A)  | 110.5(10)  |
| P(4)-C(4)-H(4A)  | 108.1(10)  |
| C(3)-C(4)-H(4B)  | 113.0(11)  |
| P(4)-C(4)-H(4B)  | 108.4(11)  |
| H(4A)-C(4)-H(4B) | 107.1(14)  |
| C(6)-C(5)-P(1)   | 114.95(9)  |
| C(6)-C(5)-H(5A)  | 109.9(9)   |
| P(1)-C(5)-H(5A)  | 106.0(9)   |
| C(6)-C(5)-H(5B)  | 108.5(10)  |
| P(1)-C(5)-H(5B)  | 109.9(10)  |
| H(5A)-C(5)-H(5B) | 107.4(13)  |
| C(7)-C(6)-C(5)   | 112.31(11) |
| C(7)-C(6)-H(6A)  | 107.6(9)   |
| C(5)-C(6)-H(6A)  | 109.9(9)   |
| C(7)-C(6)-H(6B)  | 109.7(10)  |
| C(5)-C(6)-H(6B)  | 109.4(10)  |
| H(6A)-C(6)-H(6B) | 107.8(13)  |
| O(1)-C(7)-C(6)   | 108.04(11) |
| O(1)-C(7)-H(7A)  | 110.8(10)  |
| C(6)-C(7)-H(7A)  | 110.8(9)   |
| O(1)-C(7)-H(7B)  | 109.4(9)   |
| C(6)-C(7)-H(7B)  | 111.3(9)   |
| H(7A)-C(7)-H(7B) | 106.4(13)  |
| O(1)-C(8)-H(8A)  | 110.6(11)  |

|                     |            |
|---------------------|------------|
| O(1)-C(8)-H(8B)     | 103.3(12)  |
| H(8A)-C(8)-H(8B)    | 112.1(16)  |
| O(1)-C(8)-H(8C)     | 111.0(12)  |
| H(8A)-C(8)-H(8C)    | 107.9(16)  |
| H(8B)-C(8)-H(8C)    | 111.8(16)  |
| C(10)-C(9)-P(1)     | 116.79(9)  |
| C(10)-C(9)-H(9A)    | 110.2(9)   |
| P(1)-C(9)-H(9A)     | 107.8(9)   |
| C(10)-C(9)-H(9B)    | 109.6(10)  |
| P(1)-C(9)-H(9B)     | 106.1(10)  |
| H(9A)-C(9)-H(9B)    | 105.8(13)  |
| C(11)-C(10)-C(9)    | 113.29(12) |
| C(11)-C(10)-H(10A)  | 106.8(11)  |
| C(9)-C(10)-H(10A)   | 111.4(11)  |
| C(11)-C(10)-H(10B)  | 108.6(11)  |
| C(9)-C(10)-H(10B)   | 108.7(11)  |
| H(10A)-C(10)-H(10B) | 107.9(15)  |
| O(2)-C(11)-C(10)    | 109.78(12) |
| O(2)-C(11)-H(11A)   | 110.8(10)  |
| C(10)-C(11)-H(11A)  | 110.7(10)  |
| O(2)-C(11)-H(11B)   | 106.7(11)  |
| C(10)-C(11)-H(11B)  | 111.8(11)  |
| H(11A)-C(11)-H(11B) | 107.0(14)  |
| O(2)-C(12)-H(12A)   | 109.1(14)  |
| O(2)-C(12)-H(12B)   | 107.1(12)  |
| H(12A)-C(12)-H(12B) | 110.2(18)  |
| O(2)-C(12)-H(12C)   | 109.9(12)  |
| H(12A)-C(12)-H(12C) | 104.9(18)  |
| H(12B)-C(12)-H(12C) | 115.5(17)  |
| C(14)-C(13)-P(2)    | 118.92(10) |
| C(14)-C(13)-H(13A)  | 107.8(9)   |
| P(2)-C(13)-H(13A)   | 107.2(10)  |
| C(14)-C(13)-H(13B)  | 109.0(10)  |
| P(2)-C(13)-H(13B)   | 107.3(10)  |
| H(13A)-C(13)-H(13B) | 105.8(14)  |
| C(15)-C(14)-C(13)   | 110.89(12) |

|                     |            |
|---------------------|------------|
| C(15)-C(14)-H(14A)  | 109.7(11)  |
| C(13)-C(14)-H(14A)  | 111.0(11)  |
| C(15)-C(14)-H(14B)  | 105.8(11)  |
| C(13)-C(14)-H(14B)  | 110.6(11)  |
| H(14A)-C(14)-H(14B) | 108.6(15)  |
| O(3)-C(15)-C(14)    | 108.51(13) |
| O(3)-C(15)-H(15A)   | 109.4(12)  |
| C(14)-C(15)-H(15A)  | 110.3(12)  |
| O(3)-C(15)-H(15B)   | 110.6(10)  |
| C(14)-C(15)-H(15B)  | 110.4(10)  |
| H(15A)-C(15)-H(15B) | 107.6(15)  |
| O(3)-C(16)-H(16A)   | 110.8(14)  |
| O(3)-C(16)-H(16B)   | 106.4(13)  |
| H(16A)-C(16)-H(16B) | 112.6(19)  |
| O(3)-C(16)-H(16C)   | 109.1(12)  |
| H(16A)-C(16)-H(16C) | 109.7(18)  |
| H(16B)-C(16)-H(16C) | 108.1(18)  |
| C(18)-C(17)-P(2)    | 115.68(9)  |
| C(18)-C(17)-H(17A)  | 110.6(10)  |
| P(2)-C(17)-H(17A)   | 106.6(10)  |
| C(18)-C(17)-H(17B)  | 110.7(10)  |
| P(2)-C(17)-H(17B)   | 108.3(10)  |
| H(17A)-C(17)-H(17B) | 104.2(13)  |
| C(19)-C(18)-C(17)   | 112.85(11) |
| C(19)-C(18)-H(18A)  | 107.7(10)  |
| C(17)-C(18)-H(18A)  | 109.9(10)  |
| C(19)-C(18)-H(18B)  | 109.1(9)   |
| C(17)-C(18)-H(18B)  | 110.0(9)   |
| H(18A)-C(18)-H(18B) | 107.1(14)  |
| O(4)-C(19)-C(18)    | 108.72(11) |
| O(4)-C(19)-H(19A)   | 110.1(10)  |
| C(18)-C(19)-H(19A)  | 111.4(10)  |
| O(4)-C(19)-H(19B)   | 107.5(9)   |
| C(18)-C(19)-H(19B)  | 111.8(9)   |
| H(19A)-C(19)-H(19B) | 107.3(13)  |
| O(4)-C(20)-H(20A)   | 110.0(11)  |

|                     |            |
|---------------------|------------|
| O(4)-C(20)-H(20B)   | 107.7(11)  |
| H(20A)-C(20)-H(20B) | 111.7(15)  |
| O(4)-C(20)-H(20C)   | 109.8(12)  |
| H(20A)-C(20)-H(20C) | 107.0(15)  |
| H(20B)-C(20)-H(20C) | 110.7(15)  |
| C(22)-C(21)-P(3)    | 114.75(9)  |
| C(22)-C(21)-H(21A)  | 110.5(9)   |
| P(3)-C(21)-H(21A)   | 105.8(9)   |
| C(22)-C(21)-H(21B)  | 109.6(10)  |
| P(3)-C(21)-H(21B)   | 108.5(10)  |
| H(21A)-C(21)-H(21B) | 107.4(13)  |
| C(23)-C(22)-C(21)   | 112.21(12) |
| C(23)-C(22)-H(22A)  | 108.3(9)   |
| C(21)-C(22)-H(22A)  | 110.7(9)   |
| C(23)-C(22)-H(22B)  | 107.4(10)  |
| C(21)-C(22)-H(22B)  | 110.8(10)  |
| H(22A)-C(22)-H(22B) | 107.2(14)  |
| O(5)-C(23)-C(22)    | 108.32(12) |
| O(5)-C(23)-H(23A)   | 108.4(10)  |
| C(22)-C(23)-H(23A)  | 111.4(10)  |
| O(5)-C(23)-H(23B)   | 108.5(10)  |
| C(22)-C(23)-H(23B)  | 111.3(10)  |
| H(23A)-C(23)-H(23B) | 108.7(14)  |
| O(5)-C(24)-H(24A)   | 106.7(12)  |
| O(5)-C(24)-H(24B)   | 108.7(13)  |
| H(24A)-C(24)-H(24B) | 108.5(17)  |
| O(5)-C(24)-H(24C)   | 110.6(11)  |
| H(24A)-C(24)-H(24C) | 111.0(16)  |
| H(24B)-C(24)-H(24C) | 111.2(17)  |
| C(26)-C(25)-P(3)    | 117.90(10) |
| C(26)-C(25)-H(25A)  | 110.7(10)  |
| P(3)-C(25)-H(25A)   | 106.8(10)  |
| C(26)-C(25)-H(25B)  | 109.8(10)  |
| P(3)-C(25)-H(25B)   | 106.0(10)  |
| H(25A)-C(25)-H(25B) | 104.7(14)  |
| C(27)-C(26)-C(25)   | 111.44(12) |

|                     |            |
|---------------------|------------|
| C(27)-C(26)-H(26A)  | 109.6(11)  |
| C(25)-C(26)-H(26A)  | 110.4(11)  |
| C(27)-C(26)-H(26B)  | 107.0(11)  |
| C(25)-C(26)-H(26B)  | 111.1(11)  |
| H(26A)-C(26)-H(26B) | 107.2(15)  |
| O(6)-C(27)-C(26)    | 107.98(12) |
| O(6)-C(27)-H(27A)   | 108.5(10)  |
| C(26)-C(27)-H(27A)  | 111.1(10)  |
| O(6)-C(27)-H(27B)   | 109.6(10)  |
| C(26)-C(27)-H(27B)  | 111.6(10)  |
| H(27A)-C(27)-H(27B) | 108.0(14)  |
| O(6)-C(28)-H(28A)   | 106.6(14)  |
| O(6)-C(28)-H(28B)   | 111.1(14)  |
| H(28A)-C(28)-H(28B) | 112.8(19)  |
| O(6)-C(28)-H(28C)   | 108.7(13)  |
| H(28A)-C(28)-H(28C) | 107.7(18)  |
| H(28B)-C(28)-H(28C) | 109.7(18)  |
| C(30)-C(29)-P(4)    | 116.81(9)  |
| C(30)-C(29)-H(29A)  | 108.9(10)  |
| P(4)-C(29)-H(29A)   | 106.7(9)   |
| C(30)-C(29)-H(29B)  | 110.0(10)  |
| P(4)-C(29)-H(29B)   | 106.2(10)  |
| H(29A)-C(29)-H(29B) | 108.0(13)  |
| C(31)-C(30)-C(29)   | 110.58(11) |
| C(31)-C(30)-H(30A)  | 109.7(9)   |
| C(29)-C(30)-H(30A)  | 111.2(9)   |
| C(31)-C(30)-H(30B)  | 107.7(10)  |
| C(29)-C(30)-H(30B)  | 110.2(10)  |
| H(30A)-C(30)-H(30B) | 107.3(13)  |
| O(7)-C(31)-C(30)    | 108.57(11) |
| O(7)-C(31)-H(31A)   | 108.8(9)   |
| C(30)-C(31)-H(31A)  | 111.5(9)   |
| O(7)-C(31)-H(31B)   | 108.9(9)   |
| C(30)-C(31)-H(31B)  | 110.2(9)   |
| H(31A)-C(31)-H(31B) | 108.8(13)  |
| O(7)-C(32)-H(32A)   | 111.9(11)  |

|                     |            |
|---------------------|------------|
| O(7)-C(32)-H(32B)   | 106.7(11)  |
| H(32A)-C(32)-H(32B) | 109.6(15)  |
| O(7)-C(32)-H(32C)   | 109.1(11)  |
| H(32A)-C(32)-H(32C) | 107.4(15)  |
| H(32B)-C(32)-H(32C) | 112.3(15)  |
| C(34)-C(33)-P(4)    | 114.76(9)  |
| C(34)-C(33)-H(33A)  | 110.3(10)  |
| P(4)-C(33)-H(33A)   | 109.2(10)  |
| C(34)-C(33)-H(33B)  | 109.3(10)  |
| P(4)-C(33)-H(33B)   | 106.5(10)  |
| H(33A)-C(33)-H(33B) | 106.5(13)  |
| C(35)-C(34)-C(33)   | 112.06(11) |
| C(35)-C(34)-H(34A)  | 108.6(10)  |
| C(33)-C(34)-H(34A)  | 110.4(10)  |
| C(35)-C(34)-H(34B)  | 109.1(10)  |
| C(33)-C(34)-H(34B)  | 109.8(10)  |
| H(34A)-C(34)-H(34B) | 106.7(14)  |
| O(8)-C(35)-C(34)    | 107.67(11) |
| O(8)-C(35)-H(35A)   | 110.6(10)  |
| C(34)-C(35)-H(35A)  | 110.9(10)  |
| O(8)-C(35)-H(35B)   | 111.1(10)  |
| C(34)-C(35)-H(35B)  | 110.4(10)  |
| H(35A)-C(35)-H(35B) | 106.2(14)  |
| O(8)-C(36)-H(36A)   | 111.9(11)  |
| O(8)-C(36)-H(36B)   | 108.2(10)  |
| H(36A)-C(36)-H(36B) | 109.1(15)  |
| O(8)-C(36)-H(36C)   | 110.2(11)  |
| H(36A)-C(36)-H(36C) | 106.7(15)  |
| H(36B)-C(36)-H(36C) | 110.8(15)  |
| C(43)-B(1)-C(55)    | 109.61(10) |
| C(43)-B(1)-C(49)    | 109.57(10) |
| C(55)-B(1)-C(49)    | 108.76(10) |
| C(43)-B(1)-C(37)    | 109.49(10) |
| C(55)-B(1)-C(37)    | 109.08(10) |
| C(49)-B(1)-C(37)    | 110.32(10) |
| C(42)-C(37)-C(38)   | 114.77(12) |

|                   |            |
|-------------------|------------|
| C(42)-C(37)-B(1)  | 123.77(11) |
| C(38)-C(37)-B(1)  | 121.38(11) |
| C(39)-C(38)-C(37) | 122.99(13) |
| C(39)-C(38)-H(38) | 118.1(10)  |
| C(37)-C(38)-H(38) | 118.9(10)  |
| C(40)-C(39)-C(38) | 120.07(14) |
| C(40)-C(39)-H(39) | 120.5(11)  |
| C(38)-C(39)-H(39) | 119.4(11)  |
| C(41)-C(40)-C(39) | 118.93(14) |
| C(41)-C(40)-H(40) | 122.3(12)  |
| C(39)-C(40)-H(40) | 118.8(12)  |
| C(40)-C(41)-C(42) | 120.21(14) |
| C(40)-C(41)-H(41) | 119.6(11)  |
| C(42)-C(41)-H(41) | 120.1(11)  |
| C(41)-C(42)-C(37) | 123.03(13) |
| C(41)-C(42)-H(42) | 116.5(10)  |
| C(37)-C(42)-H(42) | 120.5(10)  |
| C(48)-C(43)-C(44) | 115.39(12) |
| C(48)-C(43)-B(1)  | 123.27(11) |
| C(44)-C(43)-B(1)  | 121.31(11) |
| C(45)-C(44)-C(43) | 122.79(13) |
| C(45)-C(44)-H(44) | 117.2(10)  |
| C(43)-C(44)-H(44) | 120.0(10)  |
| C(44)-C(45)-C(46) | 120.00(13) |
| C(44)-C(45)-H(45) | 118.8(10)  |
| C(46)-C(45)-H(45) | 121.2(10)  |
| C(47)-C(46)-C(45) | 118.86(12) |
| C(47)-C(46)-H(46) | 120.2(10)  |
| C(45)-C(46)-H(46) | 120.9(10)  |
| C(46)-C(47)-C(48) | 120.46(13) |
| C(46)-C(47)-H(47) | 122.1(9)   |
| C(48)-C(47)-H(47) | 117.5(9)   |
| C(47)-C(48)-C(43) | 122.49(12) |
| C(47)-C(48)-H(48) | 118.0(9)   |
| C(43)-C(48)-H(48) | 119.6(9)   |
| C(50)-C(49)-C(54) | 114.92(12) |

|                   |            |
|-------------------|------------|
| C(50)-C(49)-B(1)  | 122.59(11) |
| C(54)-C(49)-B(1)  | 122.46(11) |
| C(51)-C(50)-C(49) | 122.71(13) |
| C(51)-C(50)-H(50) | 117.0(10)  |
| C(49)-C(50)-H(50) | 120.2(10)  |
| C(52)-C(51)-C(50) | 120.40(13) |
| C(52)-C(51)-H(51) | 121.7(11)  |
| C(50)-C(51)-H(51) | 117.9(11)  |
| C(53)-C(52)-C(51) | 118.73(13) |
| C(53)-C(52)-H(52) | 121.8(10)  |
| C(51)-C(52)-H(52) | 119.5(11)  |
| C(52)-C(53)-C(54) | 120.21(13) |
| C(52)-C(53)-H(53) | 119.3(10)  |
| C(54)-C(53)-H(53) | 120.4(10)  |
| C(53)-C(54)-C(49) | 123.00(13) |
| C(53)-C(54)-H(54) | 117.8(9)   |
| C(49)-C(54)-H(54) | 119.2(9)   |
| C(60)-C(55)-C(56) | 114.95(12) |
| C(60)-C(55)-B(1)  | 122.46(11) |
| C(56)-C(55)-B(1)  | 122.52(11) |
| C(57)-C(56)-C(55) | 122.77(13) |
| C(57)-C(56)-H(56) | 117.4(10)  |
| C(55)-C(56)-H(56) | 119.9(10)  |
| C(58)-C(57)-C(56) | 120.15(13) |
| C(58)-C(57)-H(57) | 120.4(10)  |
| C(56)-C(57)-H(57) | 119.5(10)  |
| C(57)-C(58)-C(59) | 119.01(13) |
| C(57)-C(58)-H(58) | 121.1(11)  |
| C(59)-C(58)-H(58) | 119.9(11)  |
| C(58)-C(59)-C(60) | 120.19(13) |
| C(58)-C(59)-H(59) | 120.1(10)  |
| C(60)-C(59)-H(59) | 119.7(10)  |
| C(59)-C(60)-C(55) | 122.91(13) |
| C(59)-C(60)-H(60) | 118.4(10)  |
| C(55)-C(60)-H(60) | 118.7(10)  |



**Table S3.** Atomic coordinates ( $\times 10^4$ ) and equivalent isotropic displacement parameters ( $\text{\AA}^2 \times 10^3$ ) for  $[\text{Fe}(\text{DMeOPrPE})_2\text{Cl}][\text{BPh}_4]$ .  $U(\text{eq})$  is defined as one third of the trace of the orthogonalized  $U^{ij}$  tensor.

|       | x        | y        | z       | $U(\text{eq})$ |
|-------|----------|----------|---------|----------------|
| Fe(1) | 6879(1)  | 2920(1)  | 2490(1) | 25(1)          |
| Cl(1) | 5699(1)  | 3811(1)  | 2500(1) | 33(1)          |
| P(1)  | 8280(1)  | 4086(1)  | 2955(1) | 25(1)          |
| P(2)  | 6973(1)  | 2750(1)  | 3903(1) | 28(1)          |
| P(3)  | 7108(1)  | 2826(1)  | 1063(1) | 28(1)          |
| P(4)  | 5648(1)  | 1617(1)  | 2027(1) | 29(1)          |
| O(1)  | 12190(2) | 4574(2)  | 3922(2) | 49(1)          |
| O(2)  | 7383(2)  | 7025(2)  | 2149(2) | 67(1)          |
| O(3)  | 7371(2)  | -140(2)  | 3501(2) | 59(1)          |
| O(5)  | 10473(2) | 2861(2)  | 1167(2) | 46(1)          |
| O(7)  | 6798(2)  | -766(2)  | 711(2)  | 43(1)          |
| O(8)  | 2028(2)  | 1892(2)  | 2769(3) | 98(2)          |
| B(1)  | 1546(3)  | 8037(2)  | 2643(3) | 30(1)          |
| C(1)  | 8176(3)  | 4475(2)  | 4070(2) | 30(1)          |
| C(2)  | 8010(3)  | 3656(2)  | 4524(2) | 33(1)          |
| C(3)  | 6174(3)  | 1829(2)  | 461(2)  | 35(1)          |
| C(4)  | 5224(3)  | 1658(2)  | 924(2)  | 34(1)          |
| C(5)  | 9472(2)  | 3723(2)  | 2988(2) | 28(1)          |
| C(6)  | 10399(2) | 4339(2)  | 3566(2) | 29(1)          |
| C(7)  | 11302(2) | 3927(2)  | 3511(2) | 35(1)          |
| C(8)  | 13078(3) | 4264(3)  | 3775(4) | 76(2)          |
| C(9)  | 8605(2)  | 5117(2)  | 2479(2) | 31(1)          |
| C(10) | 7858(3)  | 5707(2)  | 2588(3) | 37(1)          |
| C(11) | 8078(3)  | 6473(3)  | 2068(3) | 50(1)          |
| C(12) | 6404(4)  | 6571(4)  | 1724(4) | 95(2)          |
| C(13) | 7204(3)  | 1705(2)  | 4188(2) | 36(1)          |
| C(14) | 8105(3)  | 1451(2)  | 3795(2) | 38(1)          |
| C(15) | 8220(3)  | 524(2)   | 3932(3) | 44(1)          |
| C(16) | 7429(4)  | -1025(3) | 3617(4) | 97(2)          |
| C(17) | 5845(3)  | 2907(3)  | 4392(2) | 40(1)          |

|        |          |          |          |        |
|--------|----------|----------|----------|--------|
| C(18)  | 5828(4)  | 2834(3)  | 5322(3)  | 64(1)  |
| C(19)  | 4873(7)  | 2967(6)  | 5668(9)  | 65(3)  |
| O(4)   | 4803(3)  | 3818(3)  | 5515(3)  | 68(1)  |
| C(20)  | 4012(7)  | 4089(7)  | 5938(6)  | 115(3) |
| C(18A) | 5828(4)  | 2834(3)  | 5322(3)  | 64(1)  |
| C(19A) | 5022(15) | 3240(20) | 5710(20) | 65(3)  |
| O(4A)  | 4060(9)  | 2818(8)  | 5273(8)  | 68(1)  |
| C(20A) | 3267(17) | 3147(17) | 5625(15) | 115(3) |
| C(21)  | 8327(3)  | 2739(2)  | 701(2)   | 32(1)  |
| C(22)  | 8744(3)  | 2004(2)  | 1045(2)  | 34(1)  |
| C(23)  | 9799(3)  | 2020(2)  | 794(2)   | 39(1)  |
| C(24)  | 11474(3) | 2942(3)  | 933(3)   | 66(1)  |
| C(25)  | 6789(3)  | 3749(2)  | 591(2)   | 34(1)  |
| C(26)  | 6913(3)  | 3727(3)  | -348(2)  | 44(1)  |
| C(27)  | 6373(4)  | 4294(4)  | -778(3)  | 73(2)  |
| O(6)   | 6580(3)  | 5156(3)  | -418(3)  | 59(1)  |
| C(28)  | 5924(5)  | 5636(5)  | -834(4)  | 108(2) |
| C(27A) | 6373(4)  | 4294(4)  | -778(3)  | 73(2)  |
| O(6A)  | 5751(9)  | 4752(7)  | -469(7)  | 59(1)  |
| C(28A) | 5924(5)  | 5636(5)  | -834(4)  | 108(2) |
| C(29)  | 6148(3)  | 608(2)   | 1928(2)  | 31(1)  |
| C(30)  | 5484(3)  | -258(2)  | 1379(2)  | 33(1)  |
| C(31)  | 6041(3)  | -994(2)  | 1260(2)  | 35(1)  |
| C(32)  | 7308(3)  | -1461(3) | 539(3)   | 61(1)  |
| C(33)  | 4472(3)  | 1242(2)  | 2509(3)  | 37(1)  |
| C(34)  | 3697(3)  | 1803(3)  | 2467(3)  | 48(1)  |
| C(35)  | 2783(3)  | 1421(3)  | 2907(4)  | 62(1)  |
| C(36)  | 1076(3)  | 1462(3)  | 2912(3)  | 70(2)  |
| C(37)  | 792(2)   | 8004(2)  | 3402(2)  | 29(1)  |
| C(38)  | 450(3)   | 8754(2)  | 3756(2)  | 35(1)  |
| C(39)  | -191(3)  | 8715(3)  | 4393(2)  | 41(1)  |
| C(40)  | -529(3)  | 7923(3)  | 4715(2)  | 43(1)  |
| C(41)  | -194(3)  | 7178(3)  | 4399(2)  | 41(1)  |
| C(42)  | 450(3)   | 7226(2)  | 3767(2)  | 34(1)  |
| C(43)  | 1327(3)  | 7007(2)  | 2112(2)  | 30(1)  |
| C(44)  | 620(3)   | 6699(2)  | 1391(2)  | 33(1)  |

|       |         |         |         |       |
|-------|---------|---------|---------|-------|
| C(45) | 353(3)  | 5807(2) | 990(2)  | 40(1) |
| C(46) | 796(3)  | 5176(2) | 1282(3) | 43(1) |
| C(47) | 1512(3) | 5451(2) | 1979(3) | 43(1) |
| C(48) | 1766(3) | 6344(2) | 2387(2) | 37(1) |
| C(49) | 2743(3) | 8438(2) | 3054(2) | 32(1) |
| C(50) | 3554(3) | 8155(3) | 2713(2) | 40(1) |
| C(51) | 4563(3) | 8564(3) | 3026(3) | 50(1) |
| C(52) | 4806(3) | 9277(3) | 3686(3) | 52(1) |
| C(53) | 4031(3) | 9578(3) | 4035(3) | 49(1) |
| C(54) | 3017(3) | 9163(2) | 3726(2) | 38(1) |
| C(55) | 1324(3) | 8711(2) | 1972(2) | 31(1) |
| C(56) | 2084(3) | 9104(2) | 1495(2) | 35(1) |
| C(57) | 1934(3) | 9670(2) | 920(2)  | 39(1) |
| C(58) | 1003(3) | 9866(2) | 802(2)  | 43(1) |
| C(59) | 222(3)  | 9473(2) | 1245(2) | 39(1) |
| C(60) | 384(3)  | 8905(2) | 1810(2) | 35(1) |

---

**Table S4.** Bond lengths [ $\text{\AA}$ ] and angles [ $^\circ$ ] for  $[\text{Fe}(\text{DMeOPrPE})_2\text{Cl}][\text{BPh}_4]$ .

---

|             |            |
|-------------|------------|
| Fe(1)-P(4)  | 2.2792(9)  |
| Fe(1)-P(1)  | 2.2803(9)  |
| Fe(1)-P(2)  | 2.3130(10) |
| Fe(1)-P(3)  | 2.3175(10) |
| Fe(1)-Cl(1) | 2.3505(9)  |
| P(1)-C(1)   | 1.829(3)   |
| P(1)-C(9)   | 1.831(3)   |
| P(1)-C(5)   | 1.839(3)   |
| P(2)-C(17)  | 1.821(4)   |
| P(2)-C(13)  | 1.828(3)   |
| P(2)-C(2)   | 1.845(3)   |
| P(3)-C(21)  | 1.823(3)   |
| P(3)-C(25)  | 1.827(3)   |
| P(3)-C(3)   | 1.841(3)   |
| P(4)-C(33)  | 1.828(4)   |
| P(4)-C(4)   | 1.833(3)   |
| P(4)-C(29)  | 1.836(3)   |
| O(1)-C(7)   | 1.419(4)   |
| O(1)-C(8)   | 1.425(5)   |
| O(2)-C(11)  | 1.418(5)   |
| O(2)-C(12)  | 1.420(6)   |
| O(3)-C(15)  | 1.408(4)   |
| O(3)-C(16)  | 1.424(5)   |
| O(5)-C(24)  | 1.418(4)   |
| O(5)-C(23)  | 1.421(4)   |
| O(7)-C(31)  | 1.413(4)   |
| O(7)-C(32)  | 1.418(4)   |
| O(8)-C(36)  | 1.357(5)   |
| O(8)-C(35)  | 1.415(5)   |
| B(1)-C(37)  | 1.643(5)   |
| B(1)-C(43)  | 1.644(5)   |
| B(1)-C(49)  | 1.648(5)   |
| B(1)-C(55)  | 1.656(5)   |
| C(1)-C(2)   | 1.523(4)   |

|              |           |
|--------------|-----------|
| C(3)-C(4)    | 1.520(5)  |
| C(5)-C(6)    | 1.538(4)  |
| C(6)-C(7)    | 1.514(4)  |
| C(9)-C(10)   | 1.523(5)  |
| C(10)-C(11)  | 1.522(5)  |
| C(13)-C(14)  | 1.523(5)  |
| C(14)-C(15)  | 1.519(5)  |
| C(17)-C(18)  | 1.511(5)  |
| C(18)-C(19)  | 1.494(9)  |
| C(19)-O(4)   | 1.393(11) |
| O(4)-C(20)   | 1.425(7)  |
| C(19A)-O(4A) | 1.402(19) |
| O(4A)-C(20A) | 1.417(14) |
| C(21)-C(22)  | 1.534(4)  |
| C(22)-C(23)  | 1.512(5)  |
| C(25)-C(26)  | 1.523(5)  |
| C(26)-C(27)  | 1.478(5)  |
| C(27)-O(6)   | 1.329(6)  |
| O(6)-C(28)   | 1.468(6)  |
| C(29)-C(30)  | 1.536(4)  |
| C(30)-C(31)  | 1.507(5)  |
| C(33)-C(34)  | 1.520(5)  |
| C(34)-C(35)  | 1.509(5)  |
| C(37)-C(42)  | 1.401(5)  |
| C(37)-C(38)  | 1.412(4)  |
| C(38)-C(39)  | 1.386(5)  |
| C(39)-C(40)  | 1.382(5)  |
| C(40)-C(41)  | 1.381(5)  |
| C(41)-C(42)  | 1.384(5)  |
| C(43)-C(44)  | 1.399(5)  |
| C(43)-C(48)  | 1.406(5)  |
| C(44)-C(45)  | 1.387(5)  |
| C(45)-C(46)  | 1.378(5)  |
| C(46)-C(47)  | 1.375(5)  |
| C(47)-C(48)  | 1.393(5)  |
| C(49)-C(50)  | 1.399(5)  |

|             |          |
|-------------|----------|
| C(49)-C(54) | 1.400(5) |
| C(50)-C(51) | 1.389(5) |
| C(51)-C(52) | 1.375(6) |
| C(52)-C(53) | 1.374(6) |
| C(53)-C(54) | 1.395(5) |
| C(55)-C(60) | 1.397(5) |
| C(55)-C(56) | 1.399(5) |
| C(56)-C(57) | 1.391(5) |
| C(57)-C(58) | 1.378(5) |
| C(58)-C(59) | 1.383(5) |
| C(59)-C(60) | 1.386(5) |

|                  |            |
|------------------|------------|
| P(4)-Fe(1)-P(1)  | 171.25(4)  |
| P(4)-Fe(1)-P(2)  | 95.81(4)   |
| P(1)-Fe(1)-P(2)  | 82.64(3)   |
| P(4)-Fe(1)-P(3)  | 82.86(3)   |
| P(1)-Fe(1)-P(3)  | 96.16(3)   |
| P(2)-Fe(1)-P(3)  | 163.47(4)  |
| P(4)-Fe(1)-Cl(1) | 92.69(3)   |
| P(1)-Fe(1)-Cl(1) | 96.06(3)   |
| P(2)-Fe(1)-Cl(1) | 98.93(4)   |
| P(3)-Fe(1)-Cl(1) | 97.58(3)   |
| C(1)-P(1)-C(9)   | 105.06(16) |
| C(1)-P(1)-C(5)   | 103.65(15) |
| C(9)-P(1)-C(5)   | 103.08(15) |
| C(1)-P(1)-Fe(1)  | 106.61(11) |
| C(9)-P(1)-Fe(1)  | 123.78(11) |
| C(5)-P(1)-Fe(1)  | 112.78(10) |
| C(17)-P(2)-C(13) | 106.41(17) |
| C(17)-P(2)-C(2)  | 103.21(17) |
| C(13)-P(2)-C(2)  | 104.62(16) |
| C(17)-P(2)-Fe(1) | 112.31(12) |
| C(13)-P(2)-Fe(1) | 118.74(13) |
| C(2)-P(2)-Fe(1)  | 110.19(11) |
| C(21)-P(3)-C(25) | 105.36(16) |
| C(21)-P(3)-C(3)  | 104.62(16) |

|                   |            |
|-------------------|------------|
| C(25)-P(3)-C(3)   | 102.12(16) |
| C(21)-P(3)-Fe(1)  | 120.67(12) |
| C(25)-P(3)-Fe(1)  | 112.88(12) |
| C(3)-P(3)-Fe(1)   | 109.35(12) |
| C(33)-P(4)-C(4)   | 104.76(17) |
| C(33)-P(4)-C(29)  | 102.26(16) |
| C(4)-P(4)-C(29)   | 102.70(16) |
| C(33)-P(4)-Fe(1)  | 125.55(12) |
| C(4)-P(4)-Fe(1)   | 106.28(11) |
| C(29)-P(4)-Fe(1)  | 112.90(11) |
| C(7)-O(1)-C(8)    | 110.7(3)   |
| C(11)-O(2)-C(12)  | 111.6(4)   |
| C(15)-O(3)-C(16)  | 111.6(3)   |
| C(24)-O(5)-C(23)  | 112.1(3)   |
| C(31)-O(7)-C(32)  | 111.4(3)   |
| C(36)-O(8)-C(35)  | 115.0(4)   |
| C(37)-B(1)-C(43)  | 107.7(3)   |
| C(37)-B(1)-C(49)  | 109.8(3)   |
| C(43)-B(1)-C(49)  | 112.4(3)   |
| C(37)-B(1)-C(55)  | 112.3(3)   |
| C(43)-B(1)-C(55)  | 108.1(3)   |
| C(49)-B(1)-C(55)  | 106.6(3)   |
| C(2)-C(1)-P(1)    | 107.7(2)   |
| C(1)-C(2)-P(2)    | 108.3(2)   |
| C(4)-C(3)-P(3)    | 108.2(2)   |
| C(3)-C(4)-P(4)    | 106.7(2)   |
| C(6)-C(5)-P(1)    | 117.7(2)   |
| C(7)-C(6)-C(5)    | 109.9(3)   |
| O(1)-C(7)-C(6)    | 109.0(3)   |
| C(10)-C(9)-P(1)   | 114.5(2)   |
| C(11)-C(10)-C(9)  | 111.9(3)   |
| O(2)-C(11)-C(10)  | 113.0(3)   |
| C(14)-C(13)-P(2)  | 113.2(3)   |
| C(15)-C(14)-C(13) | 113.6(3)   |
| O(3)-C(15)-C(14)  | 109.0(3)   |
| C(18)-C(17)-P(2)  | 117.2(3)   |

|                     |           |
|---------------------|-----------|
| C(19)-C(18)-C(17)   | 113.5(6)  |
| O(4)-C(19)-C(18)    | 105.7(7)  |
| C(19)-O(4)-C(20)    | 111.1(7)  |
| C(19A)-O(4A)-C(20A) | 112.8(16) |
| C(22)-C(21)-P(3)    | 113.6(2)  |
| C(23)-C(22)-C(21)   | 111.4(3)  |
| O(5)-C(23)-C(22)    | 108.7(3)  |
| C(26)-C(25)-P(3)    | 115.8(2)  |
| C(27)-C(26)-C(25)   | 115.0(3)  |
| O(6)-C(27)-C(26)    | 115.2(4)  |
| C(27)-O(6)-C(28)    | 111.0(5)  |
| C(30)-C(29)-P(4)    | 117.5(2)  |
| C(31)-C(30)-C(29)   | 111.9(3)  |
| O(7)-C(31)-C(30)    | 109.0(3)  |
| C(34)-C(33)-P(4)    | 117.1(3)  |
| C(35)-C(34)-C(33)   | 110.8(3)  |
| O(8)-C(35)-C(34)    | 109.2(4)  |
| C(42)-C(37)-C(38)   | 114.2(3)  |
| C(42)-C(37)-B(1)    | 122.4(3)  |
| C(38)-C(37)-B(1)    | 123.4(3)  |
| C(39)-C(38)-C(37)   | 122.8(3)  |
| C(40)-C(39)-C(38)   | 120.7(4)  |
| C(39)-C(40)-C(41)   | 118.4(4)  |
| C(40)-C(41)-C(42)   | 120.5(4)  |
| C(41)-C(42)-C(37)   | 123.4(3)  |
| C(44)-C(43)-C(48)   | 114.7(3)  |
| C(44)-C(43)-B(1)    | 122.3(3)  |
| C(48)-C(43)-B(1)    | 122.7(3)  |
| C(45)-C(44)-C(43)   | 122.8(3)  |
| C(46)-C(45)-C(44)   | 120.8(4)  |
| C(47)-C(46)-C(45)   | 118.6(3)  |
| C(46)-C(47)-C(48)   | 120.3(4)  |
| C(47)-C(48)-C(43)   | 122.8(4)  |
| C(50)-C(49)-C(54)   | 115.5(3)  |
| C(50)-C(49)-B(1)    | 123.4(3)  |
| C(54)-C(49)-B(1)    | 120.8(3)  |



|                   |          |
|-------------------|----------|
| C(51)-C(50)-C(49) | 122.0(4) |
| C(52)-C(51)-C(50) | 121.0(4) |
| C(53)-C(52)-C(51) | 118.7(4) |
| C(52)-C(53)-C(54) | 120.3(4) |
| C(53)-C(54)-C(49) | 122.4(4) |
| C(60)-C(55)-C(56) | 114.9(3) |
| C(60)-C(55)-B(1)  | 124.2(3) |
| C(56)-C(55)-B(1)  | 120.9(3) |
| C(57)-C(56)-C(55) | 123.1(3) |
| C(58)-C(57)-C(56) | 119.9(4) |
| C(57)-C(58)-C(59) | 118.9(3) |
| C(58)-C(59)-C(60) | 120.3(4) |
| C(59)-C(60)-C(55) | 122.8(4) |

---

Symmetry transformations used to generate equivalent atoms:

**Table S5.** Atomic coordinates ( $\times 10^4$ ) and equivalent isotropic displacement parameters ( $\text{\AA}^2 \times 10^3$ ) for *trans*-[Fe(DMeOPrPE)<sub>2</sub>H(N<sub>2</sub>)] [BPh<sub>4</sub>]. U(eq) is defined as one third of the trace of the orthogonalized U<sup>ij</sup> tensor.

|       | x        | y        | z        | U(eq)  |
|-------|----------|----------|----------|--------|
| Fe(1) | 6865(1)  | 7810(1)  | 7499(1)  | 20(1)  |
| P(1)  | 7137(1)  | 7812(1)  | 6159(1)  | 23(1)  |
| P(2)  | 5670(1)  | 6518(1)  | 7019(1)  | 22(1)  |
| P(3)  | 6815(1)  | 7638(1)  | 8841(1)  | 24(1)  |
| P(4)  | 8257(1)  | 8949(1)  | 7973(1)  | 23(1)  |
| N(1)  | 5946(1)  | 8509(1)  | 7482(1)  | 25(1)  |
| N(2)  | 5377(2)  | 8921(1)  | 7466(1)  | 36(1)  |
| O(1)  | 10571(1) | 7874(1)  | 6219(1)  | 43(1)  |
| O(2)  | 5458(2)  | 8931(2)  | 4266(2)  | 91(1)  |
| O(3)  | 6752(1)  | 4133(1)  | 5707(1)  | 41(1)  |
| O(4)  | 2033(2)  | 6859(1)  | 7708(2)  | 64(1)  |
| O(5)  | 7562(2)  | 4857(1)  | 8370(1)  | 46(1)  |
| O(6)  | 4726(2)  | 8915(2)  | 10401(2) | 63(1)  |
| O(7)  | 12233(1) | 9558(1)  | 8910(1)  | 54(1)  |
| O(8)  | 7419(2)  | 11909(1) | 7096(1)  | 58(1)  |
| B(1)  | 1579(2)  | 2981(2)  | 7609(2)  | 26(1)  |
| C(1)  | 6238(2)  | 6822(2)  | 5503(1)  | 30(1)  |
| C(2)  | 5254(2)  | 6589(2)  | 5929(1)  | 28(1)  |
| C(3)  | 7883(2)  | 8494(2)  | 9495(1)  | 33(1)  |
| C(4)  | 8131(2)  | 9335(2)  | 9072(1)  | 29(1)  |
| C(5)  | 8393(2)  | 7782(2)  | 5813(1)  | 28(1)  |
| C(6)  | 8818(2)  | 7014(2)  | 6070(1)  | 29(1)  |
| C(7)  | 9881(2)  | 7062(2)  | 5803(2)  | 34(1)  |
| C(8)  | 11585(2) | 7972(2)  | 5993(3)  | 59(1)  |
| C(9)  | 6805(2)  | 8730(2)  | 5673(1)  | 31(1)  |
| C(10) | 7064(2)  | 8805(2)  | 4782(2)  | 48(1)  |
| C(11) | 6497(2)  | 9387(2)  | 4359(2)  | 56(1)  |
| C(12) | 4866(5)  | 9389(5)  | 3803(4)  | 146(3) |
| C(13) | 6149(2)  | 5499(1)  | 6905(1)  | 26(1)  |
| C(14) | 5447(2)  | 4647(2)  | 6384(2)  | 31(1)  |

|       |          |          |          |       |
|-------|----------|----------|----------|-------|
| C(15) | 5983(2)  | 3894(2)  | 6246(2)  | 32(1) |
| C(16) | 7219(3)  | 3419(2)  | 5494(2)  | 56(1) |
| C(17) | 4451(2)  | 6131(2)  | 7466(2)  | 28(1) |
| C(18) | 3693(2)  | 6707(2)  | 7404(2)  | 39(1) |
| C(19) | 2740(2)  | 6339(2)  | 7819(2)  | 39(1) |
| C(20) | 1044(2)  | 6447(2)  | 7906(2)  | 60(1) |
| C(21) | 6920(2)  | 6562(2)  | 9164(2)  | 33(1) |
| C(22) | 7966(2)  | 6387(2)  | 9119(2)  | 49(1) |
| C(23) | 7989(3)  | 5411(2)  | 9129(2)  | 43(1) |
| C(24) | 8363(3)  | 4989(3)  | 7781(2)  | 63(1) |
| C(25) | 5675(2)  | 7844(2)  | 9306(2)  | 34(1) |
| C(26) | 5650(4)  | 7824(3)  | 10234(2) | 87(2) |
| C(27) | 4698(3)  | 8051(2)  | 10544(2) | 72(1) |
| C(28) | 3953(4)  | 9254(3)  | 10773(3) | 99(2) |
| C(29) | 9482(2)  | 8623(2)  | 8042(1)  | 27(1) |
| C(30) | 10405(2) | 9265(2)  | 8599(1)  | 29(1) |
| C(31) | 11340(2) | 8891(2)  | 8539(2)  | 35(1) |
| C(32) | 13143(2) | 9298(3)  | 8697(3)  | 87(1) |
| C(33) | 8601(2)  | 9994(2)  | 7510(2)  | 29(1) |
| C(34) | 7845(2)  | 10583(2) | 7588(2)  | 34(1) |
| C(35) | 8126(2)  | 11360(2) | 7081(2)  | 43(1) |
| C(36) | 7573(3)  | 12518(2) | 7823(3)  | 72(1) |
| C(37) | 1329(2)  | 1951(2)  | 7095(1)  | 29(1) |
| C(38) | 626(2)   | 1668(2)  | 6376(2)  | 32(1) |
| C(39) | 335(2)   | 777(2)   | 5975(2)  | 43(1) |
| C(40) | 755(3)   | 135(2)   | 6276(2)  | 52(1) |
| C(41) | 1453(3)  | 386(2)   | 6977(2)  | 49(1) |
| C(42) | 1733(2)  | 1275(2)  | 7381(2)  | 40(1) |
| C(43) | 2793(2)  | 3358(2)  | 8013(2)  | 35(1) |
| C(44) | 3594(2)  | 3029(2)  | 7697(2)  | 47(1) |
| C(45) | 4626(2)  | 3406(3)  | 8008(2)  | 64(1) |
| C(46) | 4893(3)  | 4133(3)  | 8644(2)  | 73(1) |
| C(47) | 4135(3)  | 4478(2)  | 8962(2)  | 60(1) |
| C(48) | 3105(2)  | 4092(2)  | 8658(2)  | 43(1) |
| C(49) | 822(2)   | 2967(1)  | 8369(1)  | 26(1) |
| C(50) | 443(2)   | 2185(2)  | 8729(1)  | 30(1) |

|       |         |         |         |       |
|-------|---------|---------|---------|-------|
| C(51) | -213(2) | 2148(2) | 9358(2) | 37(1) |
| C(52) | -516(2) | 2904(2) | 9660(2) | 41(1) |
| C(53) | -151(2) | 3696(2) | 9343(2) | 40(1) |
| C(54) | 508(2)  | 3723(2) | 8714(2) | 34(1) |
| C(55) | 1376(2) | 3664(1) | 6948(1) | 26(1) |
| C(56) | 426(2)  | 3868(2) | 6787(1) | 31(1) |
| C(57) | 273(2)  | 4436(2) | 6218(2) | 37(1) |
| C(58) | 1061(2) | 4820(2) | 5772(2) | 38(1) |
| C(59) | 1995(2) | 4612(2) | 5887(1) | 36(1) |
| C(60) | 2139(2) | 4047(2) | 6464(1) | 31(1) |

---

**Table S6.** Bond lengths [Å] and angles [°] for *trans*-[Fe(DMeOPrPE)<sub>2</sub>H(N<sub>2</sub>)] [BPh<sub>4</sub>].

---

|            |            |
|------------|------------|
| Fe(1)-N(1) | 1.8337(18) |
| Fe(1)-P(3) | 2.2302(7)  |
| Fe(1)-P(1) | 2.2308(7)  |
| Fe(1)-P(4) | 2.2373(6)  |
| Fe(1)-P(2) | 2.2379(6)  |
| Fe(1)-H(1) | 1.39(3)    |
| P(1)-C(5)  | 1.830(2)   |
| P(1)-C(9)  | 1.838(2)   |
| P(1)-C(1)  | 1.848(2)   |
| P(2)-C(17) | 1.835(2)   |
| P(2)-C(13) | 1.836(2)   |
| P(2)-C(2)  | 1.840(2)   |
| P(3)-C(25) | 1.837(2)   |
| P(3)-C(21) | 1.839(2)   |
| P(3)-C(3)  | 1.849(2)   |
| P(4)-C(33) | 1.835(2)   |
| P(4)-C(29) | 1.840(2)   |
| P(4)-C(4)  | 1.840(2)   |
| N(1)-N(2)  | 1.112(3)   |
| O(1)-C(7)  | 1.417(3)   |
| O(1)-C(8)  | 1.417(3)   |
| O(2)-C(11) | 1.389(4)   |
| O(2)-C(12) | 1.424(5)   |
| O(3)-C(15) | 1.413(3)   |
| O(3)-C(16) | 1.417(3)   |
| O(4)-C(19) | 1.405(3)   |
| O(4)-C(20) | 1.405(3)   |
| O(5)-C(23) | 1.402(3)   |
| O(5)-C(24) | 1.485(4)   |
| O(6)-C(27) | 1.375(4)   |
| O(6)-C(28) | 1.416(4)   |
| O(7)-C(31) | 1.411(3)   |
| O(7)-C(32) | 1.433(4)   |
| O(8)-C(36) | 1.380(4)   |

|              |          |
|--------------|----------|
| O(8)-C(35)   | 1.424(3) |
| B(1)-C(37)   | 1.641(3) |
| B(1)-C(43)   | 1.647(3) |
| B(1)-C(55)   | 1.650(3) |
| B(1)-C(49)   | 1.655(3) |
| C(1)-C(2)    | 1.523(3) |
| C(1)-H(1A)   | 0.95(3)  |
| C(1)-H(1B)   | 0.91(3)  |
| C(2)-H(2A)   | 0.95(3)  |
| C(2)-H(2B)   | 0.95(3)  |
| C(3)-C(4)    | 1.521(3) |
| C(3)-H(3A)   | 0.94(3)  |
| C(3)-H(3B)   | 0.92(3)  |
| C(4)-H(4A)   | 1.00(3)  |
| C(4)-H(4B)   | 1.02(3)  |
| C(5)-C(6)    | 1.529(3) |
| C(5)-H(5)    | 0.98(3)  |
| C(5)-H(5B)   | 0.95(3)  |
| C(6)-C(7)    | 1.513(3) |
| C(6)-H(6B)   | 0.93(2)  |
| C(6)-H(6B)   | 1.00(3)  |
| C(7)-H(7A)   | 0.98(3)  |
| C(7)-H(7B)   | 0.99(3)  |
| C(8)-H(8A)   | 1.00(4)  |
| C(8)-H(8B)   | 1.00(4)  |
| C(8)-H(8C)   | 0.94(4)  |
| C(9)-C(10)   | 1.522(3) |
| C(9)-H(9A)   | 0.97(3)  |
| C(9)-H(9B)   | 0.97(3)  |
| C(10)-C(11)  | 1.512(4) |
| C(10)-H(10A) | 0.9900   |
| C(10)-H(10B) | 0.9900   |
| C(11)-H(11A) | 0.9900   |
| C(11)-H(11B) | 0.9900   |
| C(12)-H(12A) | 0.9800   |
| C(12)-H(12B) | 0.9800   |

|              |          |
|--------------|----------|
| C(12)-H(12C) | 0.9800   |
| C(13)-C(14)  | 1.524(3) |
| C(13)-H(13B) | 0.92(3)  |
| C(13)-H(13B) | 0.98(2)  |
| C(14)-C(15)  | 1.516(3) |
| C(14)-H(14A) | 0.95(3)  |
| C(14)-H(14B) | 0.90(3)  |
| C(15)-H(15A) | 0.96(3)  |
| C(15)-H(15B) | 0.94(3)  |
| C(16)-H(16A) | 0.87(4)  |
| C(16)-H(16B) | 0.94(4)  |
| C(16)-H(16C) | 0.93(4)  |
| C(17)-C(18)  | 1.518(3) |
| C(17)-H(17A) | 0.88(3)  |
| C(17)-H(17B) | 0.90(3)  |
| C(18)-C(19)  | 1.510(3) |
| C(18)-H(18A) | 0.98(3)  |
| C(18)-H(18B) | 0.88(3)  |
| C(19)-H(19A) | 0.9900   |
| C(19)-H(19B) | 0.9900   |
| C(20)-H(20A) | 0.9800   |
| C(20)-H(20B) | 0.9800   |
| C(20)-H(20C) | 0.9800   |
| C(21)-C(22)  | 1.503(4) |
| C(21)-H(21A) | 0.95(3)  |
| C(21)-H(21B) | 0.93(3)  |
| C(22)-C(23)  | 1.518(4) |
| C(22)-H(22B) | 0.86(3)  |
| C(22)-H(22A) | 1.02(5)  |
| C(23)-H(23B) | 1.03(4)  |
| C(23)-H(23A) | 0.86(4)  |
| C(24)-H(24A) | 0.9800   |
| C(24)-H(24B) | 0.9800   |
| C(24)-H(24C) | 0.9800   |
| C(25)-C(26)  | 1.512(4) |
| C(25)-H(25A) | 0.97(3)  |

|              |          |
|--------------|----------|
| C(25)-H(25B) | 0.94(3)  |
| C(26)-C(27)  | 1.514(4) |
| C(26)-H(26A) | 0.9900   |
| C(26)-H(26B) | 0.9900   |
| C(27)-H(27A) | 0.9900   |
| C(27)-H(27B) | 0.9900   |
| C(28)-H(28A) | 0.9800   |
| C(28)-H(28B) | 0.9800   |
| C(28)-H(28C) | 0.9800   |
| C(29)-C(30)  | 1.529(3) |
| C(29)-H(29A) | 1.00(2)  |
| C(29)-H(29B) | 0.96(3)  |
| C(30)-C(31)  | 1.514(3) |
| C(30)-H(30A) | 0.88(3)  |
| C(30)-H(30B) | 1.02(3)  |
| C(31)-H(31A) | 1.01(3)  |
| C(31)-H(31B) | 0.90(3)  |
| C(32)-H(32A) | 0.9800   |
| C(32)-H(32B) | 0.9800   |
| C(32)-H(32C) | 0.9800   |
| C(33)-C(34)  | 1.526(3) |
| C(33)-H(33A) | 0.99(2)  |
| C(33)-H(33B) | 0.89(3)  |
| C(34)-C(35)  | 1.526(3) |
| C(34)-H(34A) | 0.96(3)  |
| C(34)-H(34B) | 0.94(3)  |
| C(35)-H(35A) | 1.03(3)  |
| C(35)-H(35B) | 1.10(2)  |
| C(36)-H(36A) | 0.9800   |
| C(36)-H(36B) | 0.9800   |
| C(36)-H(36C) | 0.9800   |
| C(37)-C(38)  | 1.397(3) |
| C(37)-C(42)  | 1.403(3) |
| C(38)-C(39)  | 1.393(3) |
| C(38)-H(38)  | 0.98(2)  |
| C(39)-C(40)  | 1.379(4) |



|             |          |
|-------------|----------|
| C(39)-H(39) | 0.90(3)  |
| C(40)-C(41) | 1.371(5) |
| C(40)-H(40) | 0.84(4)  |
| C(41)-C(42) | 1.392(4) |
| C(41)-H(41) | 0.87(3)  |
| C(42)-H(42) | 0.92(3)  |
| C(43)-C(48) | 1.399(4) |
| C(43)-C(44) | 1.404(4) |
| C(44)-C(45) | 1.395(4) |
| C(44)-H(44) | 0.92(3)  |
| C(45)-C(46) | 1.380(6) |
| C(45)-H(45) | 0.98(4)  |
| C(46)-C(47) | 1.368(6) |
| C(46)-H(46) | 0.88(4)  |
| C(47)-C(48) | 1.393(4) |
| C(47)-H(47) | 0.90(4)  |
| C(48)-H(48) | 0.93(3)  |
| C(49)-C(54) | 1.403(3) |
| C(49)-C(50) | 1.406(3) |
| C(50)-C(51) | 1.395(3) |
| C(50)-H(50) | 0.93(3)  |
| C(51)-C(52) | 1.375(4) |
| C(51)-H(51) | 1.02(3)  |
| C(52)-C(53) | 1.378(4) |
| C(52)-H(52) | 0.84(3)  |
| C(53)-C(54) | 1.397(4) |
| C(53)-H(53) | 0.99(3)  |
| C(54)-H(54) | 0.92(3)  |
| C(55)-C(60) | 1.399(3) |
| C(55)-C(56) | 1.405(3) |
| C(56)-C(57) | 1.390(3) |
| C(56)-H(56) | 0.94(3)  |
| C(57)-C(58) | 1.382(4) |
| C(57)-H(57) | 0.89(3)  |
| C(58)-C(59) | 1.379(4) |
| C(58)-H(58) | 0.95(3)  |

|                  |            |
|------------------|------------|
| C(59)-C(60)      | 1.391(3)   |
| C(59)-H(59)      | 0.93(3)    |
| C(60)-H(60)      | 0.94(2)    |
| N(1)-Fe(1)-P(3)  | 96.04(6)   |
| N(1)-Fe(1)-P(1)  | 95.39(6)   |
| P(3)-Fe(1)-P(1)  | 168.57(2)  |
| N(1)-Fe(1)-P(4)  | 96.01(6)   |
| P(3)-Fe(1)-P(4)  | 84.48(2)   |
| P(1)-Fe(1)-P(4)  | 94.37(2)   |
| N(1)-Fe(1)-P(2)  | 94.16(6)   |
| P(3)-Fe(1)-P(2)  | 94.87(2)   |
| P(1)-Fe(1)-P(2)  | 84.26(2)   |
| P(4)-Fe(1)-P(2)  | 169.83(2)  |
| N(1)-Fe(1)-H(1)  | 178.0(11)  |
| P(3)-Fe(1)-H(1)  | 84.8(11)   |
| P(1)-Fe(1)-H(1)  | 83.8(11)   |
| P(4)-Fe(1)-H(1)  | 85.9(11)   |
| P(2)-Fe(1)-H(1)  | 84.0(11)   |
| C(5)-P(1)-C(9)   | 103.90(10) |
| C(5)-P(1)-C(1)   | 103.39(11) |
| C(9)-P(1)-C(1)   | 100.09(11) |
| C(5)-P(1)-Fe(1)  | 121.14(7)  |
| C(9)-P(1)-Fe(1)  | 115.53(8)  |
| C(1)-P(1)-Fe(1)  | 110.18(7)  |
| C(17)-P(2)-C(13) | 102.41(10) |
| C(17)-P(2)-C(2)  | 103.61(11) |
| C(13)-P(2)-C(2)  | 102.31(10) |
| C(17)-P(2)-Fe(1) | 124.54(8)  |
| C(13)-P(2)-Fe(1) | 115.16(7)  |
| C(2)-P(2)-Fe(1)  | 106.21(8)  |
| C(25)-P(3)-C(21) | 103.88(11) |
| C(25)-P(3)-C(3)  | 102.35(12) |
| C(21)-P(3)-C(3)  | 103.97(12) |
| C(25)-P(3)-Fe(1) | 115.26(8)  |
| C(21)-P(3)-Fe(1) | 119.31(8)  |

|                  |            |
|------------------|------------|
| C(3)-P(3)-Fe(1)  | 110.21(8)  |
| C(33)-P(4)-C(29) | 102.34(10) |
| C(33)-P(4)-C(4)  | 104.23(11) |
| C(29)-P(4)-C(4)  | 102.83(11) |
| C(33)-P(4)-Fe(1) | 123.42(8)  |
| C(29)-P(4)-Fe(1) | 114.74(7)  |
| C(4)-P(4)-Fe(1)  | 107.07(8)  |
| N(2)-N(1)-Fe(1)  | 178.85(19) |
| C(7)-O(1)-C(8)   | 112.0(2)   |
| C(11)-O(2)-C(12) | 110.6(4)   |
| C(15)-O(3)-C(16) | 111.5(2)   |
| C(19)-O(4)-C(20) | 113.0(2)   |
| C(23)-O(5)-C(24) | 107.4(2)   |
| C(27)-O(6)-C(28) | 112.8(3)   |
| C(31)-O(7)-C(32) | 110.6(2)   |
| C(36)-O(8)-C(35) | 112.8(2)   |
| C(37)-B(1)-C(43) | 112.11(19) |
| C(37)-B(1)-C(55) | 108.51(17) |
| C(43)-B(1)-C(55) | 106.96(17) |
| C(37)-B(1)-C(49) | 108.04(17) |
| C(43)-B(1)-C(49) | 109.29(18) |
| C(55)-B(1)-C(49) | 111.96(18) |
| C(2)-C(1)-P(1)   | 107.55(15) |
| C(2)-C(1)-H(1A)  | 112.1(17)  |
| P(1)-C(1)-H(1A)  | 108.0(17)  |
| C(2)-C(1)-H(1B)  | 112.7(18)  |
| P(1)-C(1)-H(1B)  | 107.5(18)  |
| H(1A)-C(1)-H(1B) | 109(2)     |
| C(1)-C(2)-P(2)   | 105.85(15) |
| C(1)-C(2)-H(2A)  | 116.9(15)  |
| P(2)-C(2)-H(2A)  | 110.5(15)  |
| C(1)-C(2)-H(2B)  | 111.5(15)  |
| P(2)-C(2)-H(2B)  | 106.5(14)  |
| H(2A)-C(2)-H(2B) | 105(2)     |
| C(4)-C(3)-P(3)   | 108.29(16) |
| C(4)-C(3)-H(3A)  | 113.4(18)  |

|                  |            |
|------------------|------------|
| P(3)-C(3)-H(3A)  | 104.4(18)  |
| C(4)-C(3)-H(3B)  | 113.2(18)  |
| P(3)-C(3)-H(3B)  | 108.1(18)  |
| H(3A)-C(3)-H(3B) | 109(2)     |
| C(3)-C(4)-P(4)   | 106.44(15) |
| C(3)-C(4)-H(4A)  | 111.7(15)  |
| P(4)-C(4)-H(4A)  | 113.0(15)  |
| C(3)-C(4)-H(4B)  | 114.4(15)  |
| P(4)-C(4)-H(4B)  | 104.5(14)  |
| H(4A)-C(4)-H(4B) | 107(2)     |
| C(6)-C(5)-P(1)   | 115.07(16) |
| C(6)-C(5)-H(5)   | 111.1(14)  |
| P(1)-C(5)-H(5)   | 104.0(15)  |
| C(6)-C(5)-H(5B)  | 110.2(15)  |
| P(1)-C(5)-H(5B)  | 108.0(15)  |
| H(5)-C(5)-H(5B)  | 108(2)     |
| C(7)-C(6)-C(5)   | 112.00(19) |
| C(7)-C(6)-H(6B)  | 108.4(14)  |
| C(5)-C(6)-H(6B)  | 110.2(14)  |
| C(7)-C(6)-H(6B)  | 107.7(15)  |
| C(5)-C(6)-H(6B)  | 112.1(15)  |
| H(6B)-C(6)-H(6B) | 106(2)     |
| O(1)-C(7)-C(6)   | 108.76(17) |
| O(1)-C(7)-H(7A)  | 109.1(16)  |
| C(6)-C(7)-H(7A)  | 113.1(16)  |
| O(1)-C(7)-H(7B)  | 108.0(16)  |
| C(6)-C(7)-H(7B)  | 109.5(16)  |
| H(7A)-C(7)-H(7B) | 108(2)     |
| O(1)-C(8)-H(8A)  | 107(2)     |
| O(1)-C(8)-H(8B)  | 107(2)     |
| H(8A)-C(8)-H(8B) | 104(3)     |
| O(1)-C(8)-H(8C)  | 107(2)     |
| H(8A)-C(8)-H(8C) | 121(3)     |
| H(8B)-C(8)-H(8C) | 110(3)     |
| C(10)-C(9)-P(1)  | 117.21(17) |
| C(10)-C(9)-H(9A) | 112.2(16)  |

|                     |            |
|---------------------|------------|
| P(1)-C(9)-H(9A)     | 100.3(16)  |
| C(10)-C(9)-H(9B)    | 113.1(18)  |
| P(1)-C(9)-H(9B)     | 111.2(17)  |
| H(9A)-C(9)-H(9B)    | 101(2)     |
| C(11)-C(10)-C(9)    | 112.6(2)   |
| C(11)-C(10)-H(10A)  | 109.1      |
| C(9)-C(10)-H(10A)   | 109.1      |
| C(11)-C(10)-H(10B)  | 109.1      |
| C(9)-C(10)-H(10B)   | 109.1      |
| H(10A)-C(10)-H(10B) | 107.8      |
| O(2)-C(11)-C(10)    | 106.4(3)   |
| O(2)-C(11)-H(11A)   | 110.4      |
| C(10)-C(11)-H(11A)  | 110.4      |
| O(2)-C(11)-H(11B)   | 110.4      |
| C(10)-C(11)-H(11B)  | 110.4      |
| H(11A)-C(11)-H(11B) | 108.6      |
| O(2)-C(12)-H(12A)   | 109.5      |
| O(2)-C(12)-H(12B)   | 109.5      |
| H(12A)-C(12)-H(12B) | 109.5      |
| O(2)-C(12)-H(12C)   | 109.5      |
| H(12A)-C(12)-H(12C) | 109.5      |
| H(12B)-C(12)-H(12C) | 109.5      |
| C(14)-C(13)-P(2)    | 117.33(15) |
| C(14)-C(13)-H(13B)  | 108.8(17)  |
| P(2)-C(13)-H(13B)   | 106.8(17)  |
| C(14)-C(13)-H(13B)  | 107.5(14)  |
| P(2)-C(13)-H(13B)   | 108.5(14)  |
| H(13B)-C(13)-H(13B) | 108(2)     |
| C(15)-C(14)-C(13)   | 112.08(19) |
| C(15)-C(14)-H(14A)  | 108.9(16)  |
| C(13)-C(14)-H(14A)  | 110.2(16)  |
| C(15)-C(14)-H(14B)  | 110.7(17)  |
| C(13)-C(14)-H(14B)  | 108.9(18)  |
| H(14A)-C(14)-H(14B) | 106(2)     |
| O(3)-C(15)-C(14)    | 108.87(19) |
| O(3)-C(15)-H(15A)   | 107.1(15)  |

|                     |            |
|---------------------|------------|
| C(14)-C(15)-H(15A)  | 111.6(15)  |
| O(3)-C(15)-H(15B)   | 108.2(16)  |
| C(14)-C(15)-H(15B)  | 111.9(16)  |
| H(15A)-C(15)-H(15B) | 109(2)     |
| O(3)-C(16)-H(16A)   | 113(3)     |
| O(3)-C(16)-H(16B)   | 106(2)     |
| H(16A)-C(16)-H(16B) | 114(3)     |
| O(3)-C(16)-H(16C)   | 106(2)     |
| H(16A)-C(16)-H(16C) | 100(3)     |
| H(16B)-C(16)-H(16C) | 117(3)     |
| C(18)-C(17)-P(2)    | 116.32(16) |
| C(18)-C(17)-H(17A)  | 109(2)     |
| P(2)-C(17)-H(17A)   | 104.1(19)  |
| C(18)-C(17)-H(17B)  | 109.4(17)  |
| P(2)-C(17)-H(17B)   | 106.8(17)  |
| H(17A)-C(17)-H(17B) | 111(3)     |
| C(19)-C(18)-C(17)   | 111.4(2)   |
| C(19)-C(18)-H(18A)  | 108.2(19)  |
| C(17)-C(18)-H(18A)  | 108.6(19)  |
| C(19)-C(18)-H(18B)  | 110(2)     |
| C(17)-C(18)-H(18B)  | 111(2)     |
| H(18A)-C(18)-H(18B) | 109(3)     |
| O(4)-C(19)-C(18)    | 109.7(2)   |
| O(4)-C(19)-H(19A)   | 109.7      |
| C(18)-C(19)-H(19A)  | 109.7      |
| O(4)-C(19)-H(19B)   | 109.7      |
| C(18)-C(19)-H(19B)  | 109.7      |
| H(19A)-C(19)-H(19B) | 108.2      |
| O(4)-C(20)-H(20A)   | 109.5      |
| O(4)-C(20)-H(20B)   | 109.5      |
| H(20A)-C(20)-H(20B) | 109.5      |
| O(4)-C(20)-H(20C)   | 109.5      |
| H(20A)-C(20)-H(20C) | 109.5      |
| H(20B)-C(20)-H(20C) | 109.5      |
| C(22)-C(21)-P(3)    | 114.61(19) |
| C(22)-C(21)-H(21A)  | 111.7(16)  |

|                     |           |
|---------------------|-----------|
| P(3)-C(21)-H(21A)   | 108.2(16) |
| C(22)-C(21)-H(21B)  | 111.4(17) |
| P(3)-C(21)-H(21B)   | 109.8(17) |
| H(21A)-C(21)-H(21B) | 100(2)    |
| C(21)-C(22)-C(23)   | 115.0(3)  |
| C(21)-C(22)-H(22B)  | 112.0(19) |
| C(23)-C(22)-H(22B)  | 105.2(19) |
| C(21)-C(22)-H(22A)  | 105(3)    |
| C(23)-C(22)-H(22A)  | 106(3)    |
| H(22B)-C(22)-H(22A) | 113(3)    |
| O(5)-C(23)-C(22)    | 112.4(2)  |
| O(5)-C(23)-H(23B)   | 95(2)     |
| C(22)-C(23)-H(23B)  | 116.1(19) |
| O(5)-C(23)-H(23A)   | 107(2)    |
| C(22)-C(23)-H(23A)  | 112(2)    |
| H(23B)-C(23)-H(23A) | 113(3)    |
| O(5)-C(24)-H(24A)   | 109.5     |
| O(5)-C(24)-H(24B)   | 109.5     |
| H(24A)-C(24)-H(24B) | 109.5     |
| O(5)-C(24)-H(24C)   | 109.5     |
| H(24A)-C(24)-H(24C) | 109.5     |
| H(24B)-C(24)-H(24C) | 109.5     |
| C(26)-C(25)-P(3)    | 117.4(2)  |
| C(26)-C(25)-H(25A)  | 107.2(19) |
| P(3)-C(25)-H(25A)   | 109.4(19) |
| C(26)-C(25)-H(25B)  | 105.5(17) |
| P(3)-C(25)-H(25B)   | 108.9(17) |
| H(25A)-C(25)-H(25B) | 108(3)    |
| C(25)-C(26)-C(27)   | 112.0(3)  |
| C(25)-C(26)-H(26A)  | 109.2     |
| C(27)-C(26)-H(26A)  | 109.2     |
| C(25)-C(26)-H(26B)  | 109.2     |
| C(27)-C(26)-H(26B)  | 109.2     |
| H(26A)-C(26)-H(26B) | 107.9     |
| O(6)-C(27)-C(26)    | 107.6(3)  |
| O(6)-C(27)-H(27A)   | 110.2     |

|                     |            |
|---------------------|------------|
| C(26)-C(27)-H(27A)  | 110.2      |
| O(6)-C(27)-H(27B)   | 110.2      |
| C(26)-C(27)-H(27B)  | 110.2      |
| H(27A)-C(27)-H(27B) | 108.5      |
| O(6)-C(28)-H(28A)   | 109.5      |
| O(6)-C(28)-H(28B)   | 109.5      |
| H(28A)-C(28)-H(28B) | 109.5      |
| O(6)-C(28)-H(28C)   | 109.5      |
| H(28A)-C(28)-H(28C) | 109.5      |
| H(28B)-C(28)-H(28C) | 109.5      |
| C(30)-C(29)-P(4)    | 118.14(15) |
| C(30)-C(29)-H(29A)  | 110.8(15)  |
| P(4)-C(29)-H(29A)   | 104.9(14)  |
| C(30)-C(29)-H(29B)  | 110.5(16)  |
| P(4)-C(29)-H(29B)   | 104.2(16)  |
| H(29A)-C(29)-H(29B) | 108(2)     |
| C(31)-C(30)-C(29)   | 109.64(18) |
| C(31)-C(30)-H(30A)  | 106.8(17)  |
| C(29)-C(30)-H(30A)  | 110.5(18)  |
| C(31)-C(30)-H(30B)  | 110.7(15)  |
| C(29)-C(30)-H(30B)  | 109.4(15)  |
| H(30A)-C(30)-H(30B) | 110(2)     |
| O(7)-C(31)-C(30)    | 109.8(2)   |
| O(7)-C(31)-H(31A)   | 109.0(16)  |
| C(30)-C(31)-H(31A)  | 109.3(15)  |
| O(7)-C(31)-H(31B)   | 109.3(17)  |
| C(30)-C(31)-H(31B)  | 110.2(17)  |
| H(31A)-C(31)-H(31B) | 109(2)     |
| O(7)-C(32)-H(32A)   | 109.5      |
| O(7)-C(32)-H(32B)   | 109.5      |
| H(32A)-C(32)-H(32B) | 109.5      |
| O(7)-C(32)-H(32C)   | 109.5      |
| H(32A)-C(32)-H(32C) | 109.5      |
| H(32B)-C(32)-H(32C) | 109.5      |
| C(34)-C(33)-P(4)    | 115.50(16) |
| C(34)-C(33)-H(33A)  | 112.9(14)  |



|                     |            |
|---------------------|------------|
| P(4)-C(33)-H(33A)   | 104.5(14)  |
| C(34)-C(33)-H(33B)  | 111.5(17)  |
| P(4)-C(33)-H(33B)   | 108.1(18)  |
| H(33A)-C(33)-H(33B) | 103(2)     |
| C(35)-C(34)-C(33)   | 110.9(2)   |
| C(35)-C(34)-H(34A)  | 111.9(15)  |
| C(33)-C(34)-H(34A)  | 108.8(15)  |
| C(35)-C(34)-H(34B)  | 109.9(16)  |
| C(33)-C(34)-H(34B)  | 109.8(16)  |
| H(34A)-C(34)-H(34B) | 105(2)     |
| O(8)-C(35)-C(34)    | 113.6(2)   |
| O(8)-C(35)-H(35A)   | 109.3(15)  |
| C(34)-C(35)-H(35A)  | 108.4(16)  |
| O(8)-C(35)-H(35B)   | 101.2(11)  |
| C(34)-C(35)-H(35B)  | 103.3(11)  |
| H(35A)-C(35)-H(35B) | 121.0(19)  |
| O(8)-C(36)-H(36A)   | 109.5      |
| O(8)-C(36)-H(36B)   | 109.5      |
| H(36A)-C(36)-H(36B) | 109.5      |
| O(8)-C(36)-H(36C)   | 109.5      |
| H(36A)-C(36)-H(36C) | 109.5      |
| H(36B)-C(36)-H(36C) | 109.5      |
| C(38)-C(37)-C(42)   | 115.2(2)   |
| C(38)-C(37)-B(1)    | 121.81(19) |
| C(42)-C(37)-B(1)    | 122.8(2)   |
| C(39)-C(38)-C(37)   | 122.6(2)   |
| C(39)-C(38)-H(38)   | 118.0(15)  |
| C(37)-C(38)-H(38)   | 119.4(14)  |
| C(40)-C(39)-C(38)   | 120.2(3)   |
| C(40)-C(39)-H(39)   | 118.2(19)  |
| C(38)-C(39)-H(39)   | 121.5(19)  |
| C(41)-C(40)-C(39)   | 119.1(3)   |
| C(41)-C(40)-H(40)   | 117(2)     |
| C(39)-C(40)-H(40)   | 124(2)     |
| C(40)-C(41)-C(42)   | 120.5(3)   |
| C(40)-C(41)-H(41)   | 122(2)     |

|                   |            |
|-------------------|------------|
| C(42)-C(41)-H(41) | 118(2)     |
| C(41)-C(42)-C(37) | 122.4(3)   |
| C(41)-C(42)-H(42) | 119.1(17)  |
| C(37)-C(42)-H(42) | 118.5(17)  |
| C(48)-C(43)-C(44) | 115.2(2)   |
| C(48)-C(43)-B(1)  | 121.2(2)   |
| C(44)-C(43)-B(1)  | 123.4(2)   |
| C(45)-C(44)-C(43) | 122.3(3)   |
| C(45)-C(44)-H(44) | 117.6(19)  |
| C(43)-C(44)-H(44) | 120.0(19)  |
| C(46)-C(45)-C(44) | 120.2(4)   |
| C(46)-C(45)-H(45) | 128(2)     |
| C(44)-C(45)-H(45) | 112(2)     |
| C(47)-C(46)-C(45) | 119.2(3)   |
| C(47)-C(46)-H(46) | 116(3)     |
| C(45)-C(46)-H(46) | 125(3)     |
| C(46)-C(47)-C(48) | 120.4(4)   |
| C(46)-C(47)-H(47) | 123(2)     |
| C(48)-C(47)-H(47) | 117(2)     |
| C(47)-C(48)-C(43) | 122.7(3)   |
| C(47)-C(48)-H(48) | 115.7(17)  |
| C(43)-C(48)-H(48) | 121.6(17)  |
| C(54)-C(49)-C(50) | 114.2(2)   |
| C(54)-C(49)-B(1)  | 123.73(19) |
| C(50)-C(49)-B(1)  | 122.11(19) |
| C(51)-C(50)-C(49) | 123.4(2)   |
| C(51)-C(50)-H(50) | 117.1(15)  |
| C(49)-C(50)-H(50) | 119.5(15)  |
| C(52)-C(51)-C(50) | 119.9(2)   |
| C(52)-C(51)-H(51) | 119.0(16)  |
| C(50)-C(51)-H(51) | 121.0(16)  |
| C(51)-C(52)-C(53) | 119.2(2)   |
| C(51)-C(52)-H(52) | 122(2)     |
| C(53)-C(52)-H(52) | 119(2)     |
| C(52)-C(53)-C(54) | 120.1(2)   |
| C(52)-C(53)-H(53) | 119.0(16)  |

|                   |            |
|-------------------|------------|
| C(54)-C(53)-H(53) | 120.9(16)  |
| C(53)-C(54)-C(49) | 123.1(2)   |
| C(53)-C(54)-H(54) | 117.8(16)  |
| C(49)-C(54)-H(54) | 119.1(16)  |
| C(60)-C(55)-C(56) | 114.6(2)   |
| C(60)-C(55)-B(1)  | 121.47(19) |
| C(56)-C(55)-B(1)  | 123.84(19) |
| C(57)-C(56)-C(55) | 122.6(2)   |
| C(57)-C(56)-H(56) | 116.4(15)  |
| C(55)-C(56)-H(56) | 121.0(15)  |
| C(58)-C(57)-C(56) | 120.6(2)   |
| C(58)-C(57)-H(57) | 120.7(18)  |
| C(56)-C(57)-H(57) | 118.7(18)  |
| C(59)-C(58)-C(57) | 118.7(2)   |
| C(59)-C(58)-H(58) | 123.1(16)  |
| C(57)-C(58)-H(58) | 118.1(16)  |
| C(58)-C(59)-C(60) | 119.9(2)   |
| C(58)-C(59)-H(59) | 118.1(17)  |
| C(60)-C(59)-H(59) | 121.7(18)  |
| C(59)-C(60)-C(55) | 123.4(2)   |
| C(59)-C(60)-H(60) | 116.8(15)  |
| C(55)-C(60)-H(60) | 119.8(15)  |

---

Symmetry transformations used to generate equivalent atoms:
